# Supplementary material for: Characterization of Post-Translational Modifications and Cytotoxic Properties of the Adenylate-Cyclase Hemolysin Produced by Various Bordetella pertussis and Bordetella parapertussis Isolates
Source: MDPI journal article supplement (doi:10.3390/toxins9100304), 2017-09-26
Supplement: s1 [file s1]

# Bpp K-894 Myristoylation – Best MSMS Spectra – FR5340

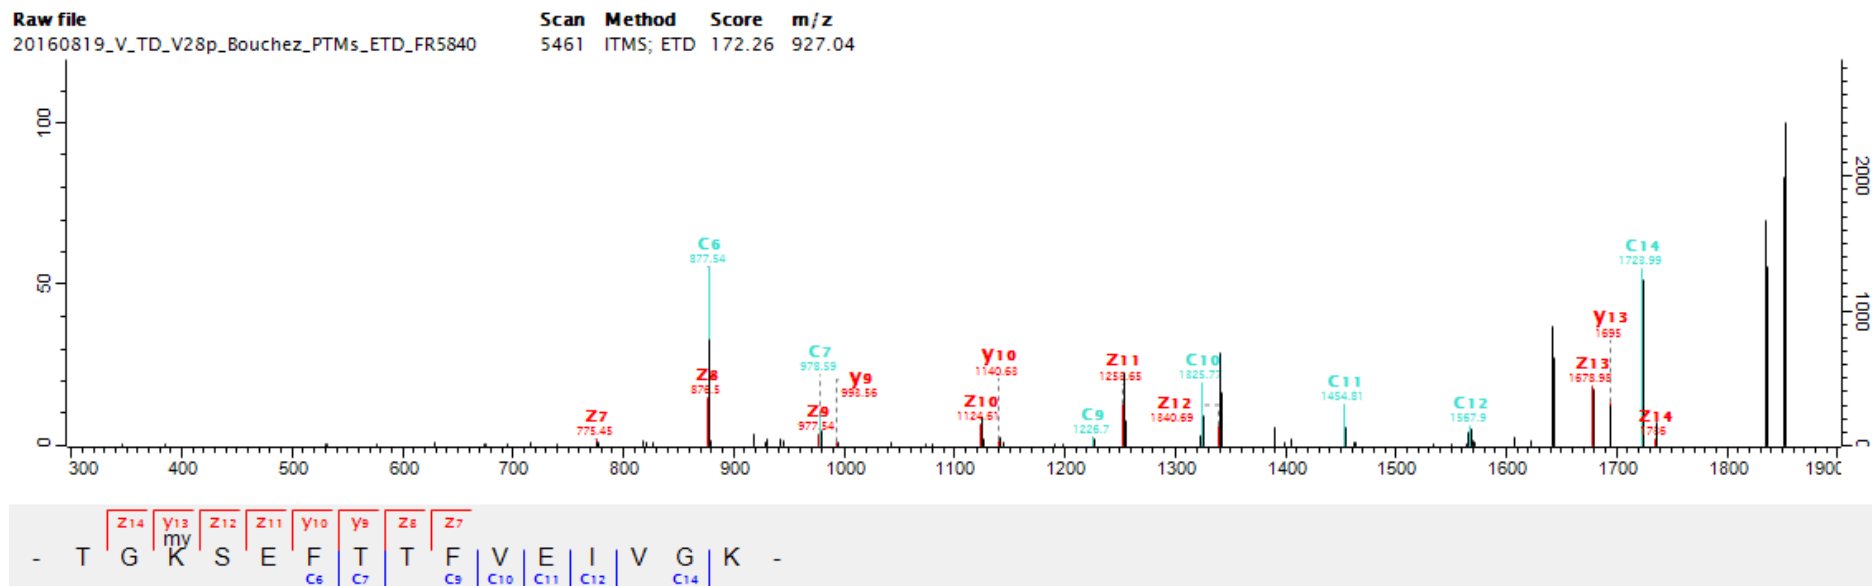

## MS/MS spectrum of the myristoylated lysine K-894 of Bpp-AC-Hly

Annotated MaxQuant MS/MS spectrum corresponding to the peptide containing the modified Lysine K-894 with a myristoyl group.

# Bpp K-894 Myristoylation – MSMS Spectra – 12822

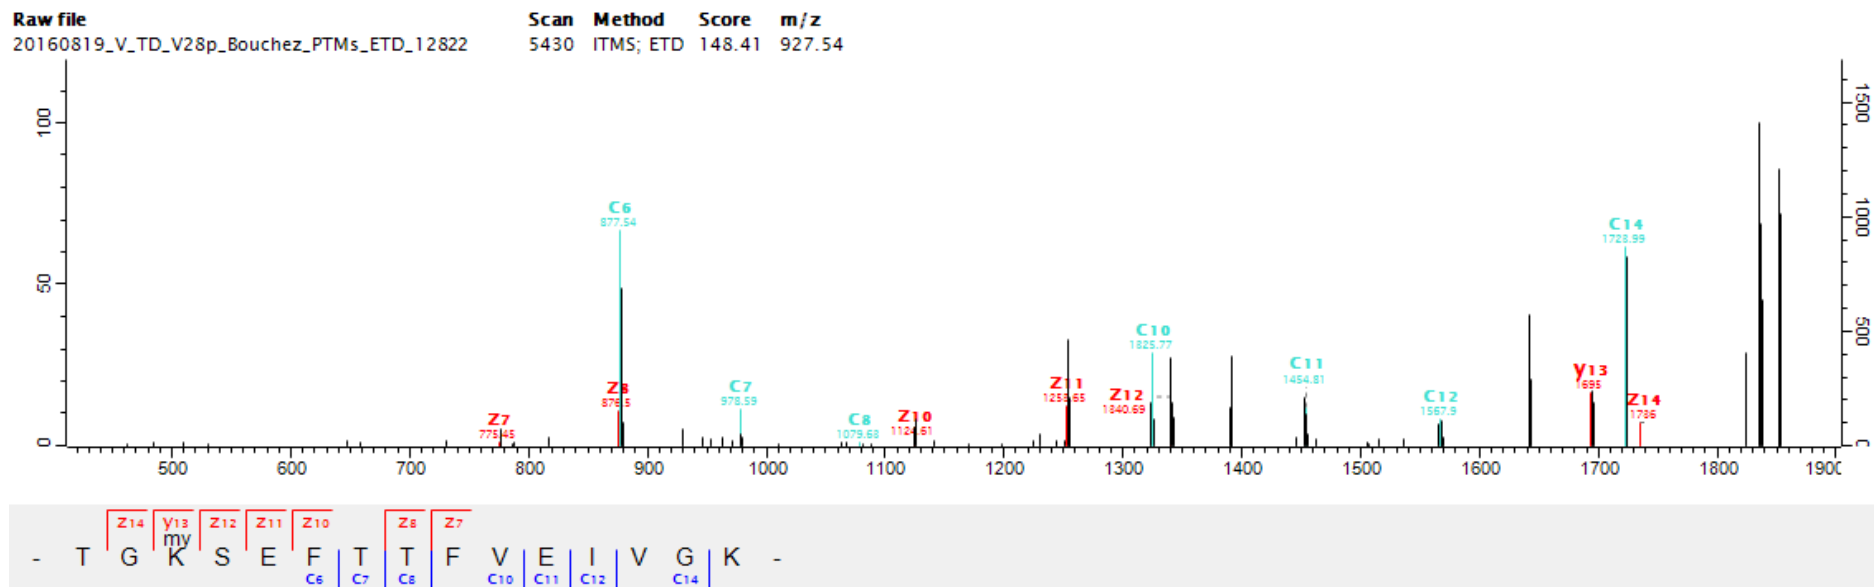

## MS/MS spectrum of the myristoylated lysine K-894 of Bpp-AC-Hly

Annotated MaxQuant MS/MS spectrum corresponding to the peptide containing the modified Lysine K-894 with a myristoyl group.

# Bpp K-894 Palmitoylation – Best MSMS Spectra – FR3728

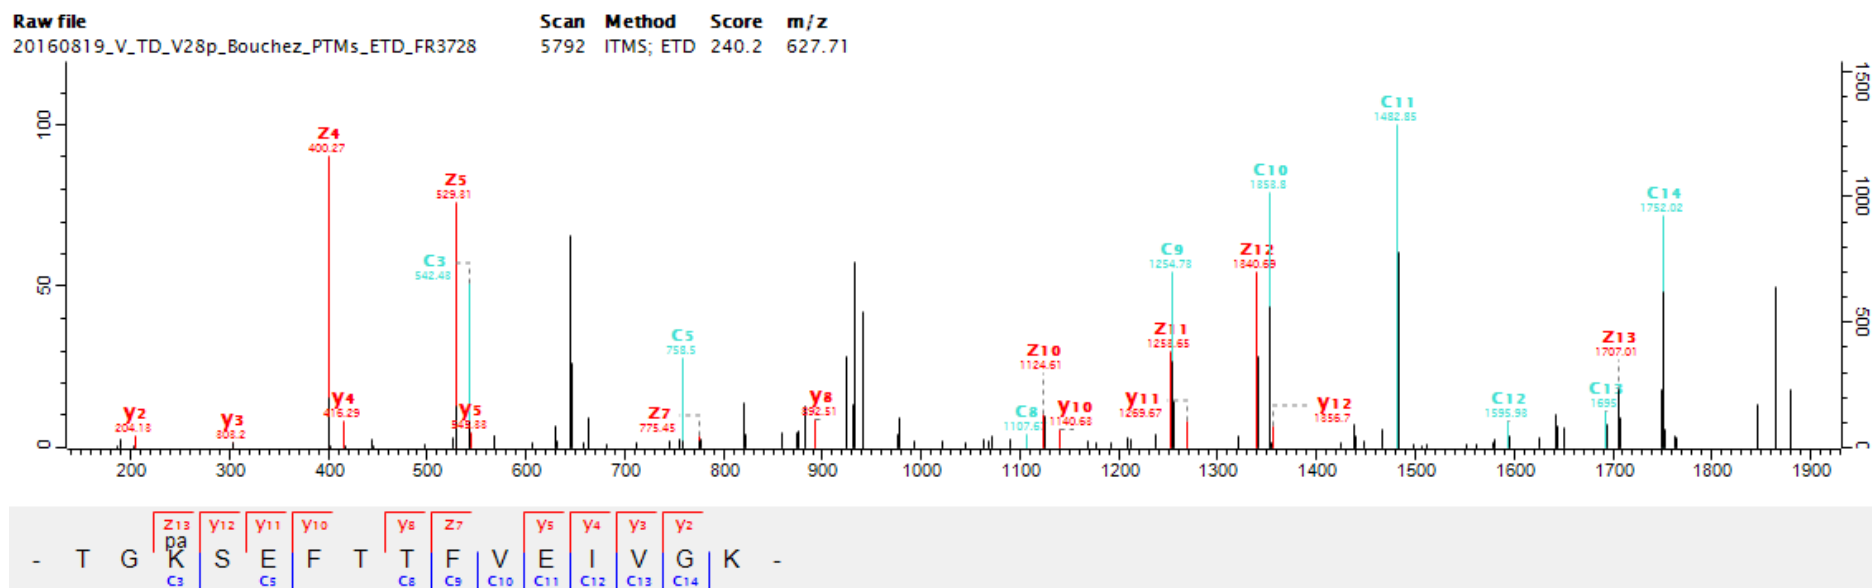

## MS/MS spectrum of the palmitoylated lysine K-894 of Bpp-AC-Hly

Annotated MaxQuant MS/MS spectrum corresponding to the peptide containing the modified Lysine K-894 with a palmitoyl group.

# Bpp K-894 Palmitoylation – MSMS Spectra – 12822

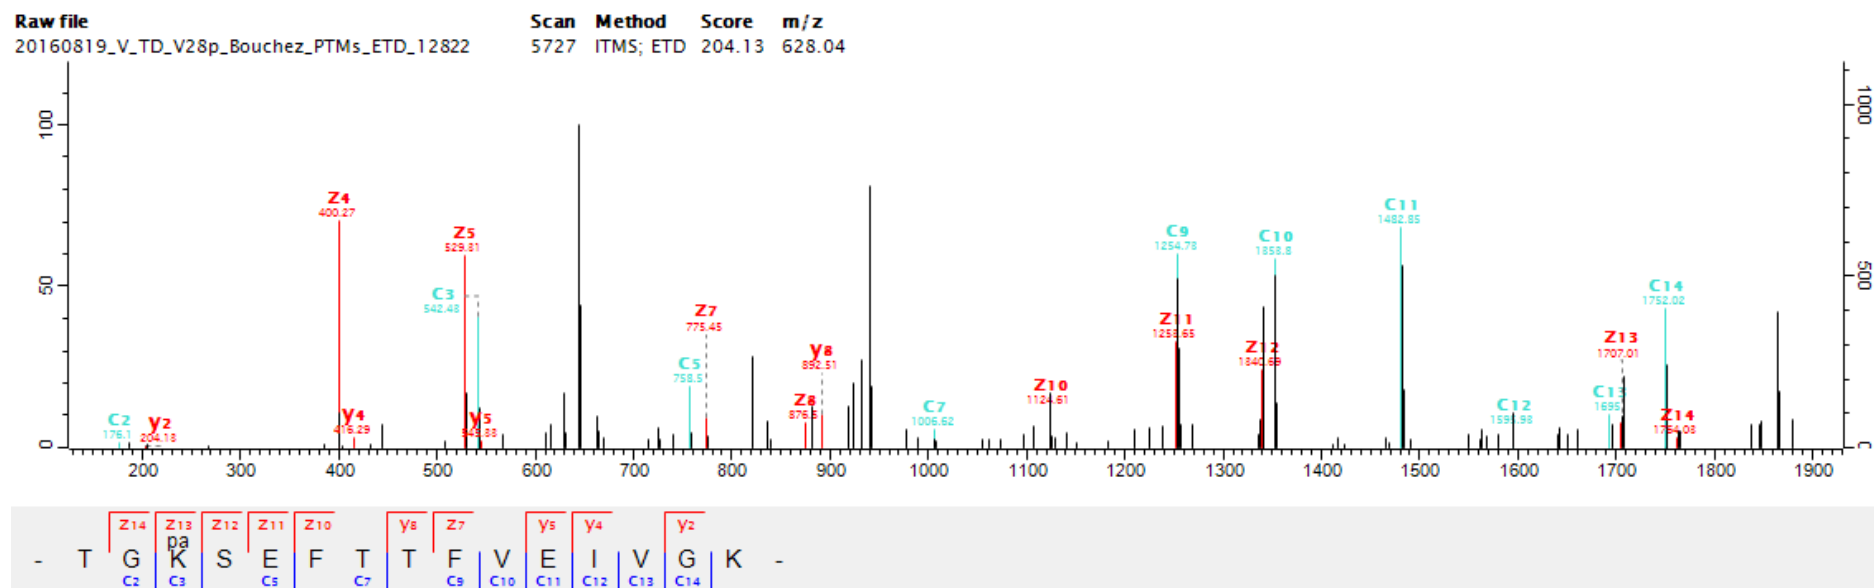

## MS/MS spectrum of the palmitoylated lysine K-894 of Bpp-AC-Hly

Annotated MaxQuant MS/MS spectrum corresponding to the peptide containing the modified Lysine K-894 with a palmitoyl group.

# Bpp K-1017 Myristoylation – Best MSMS Spectra – 12822

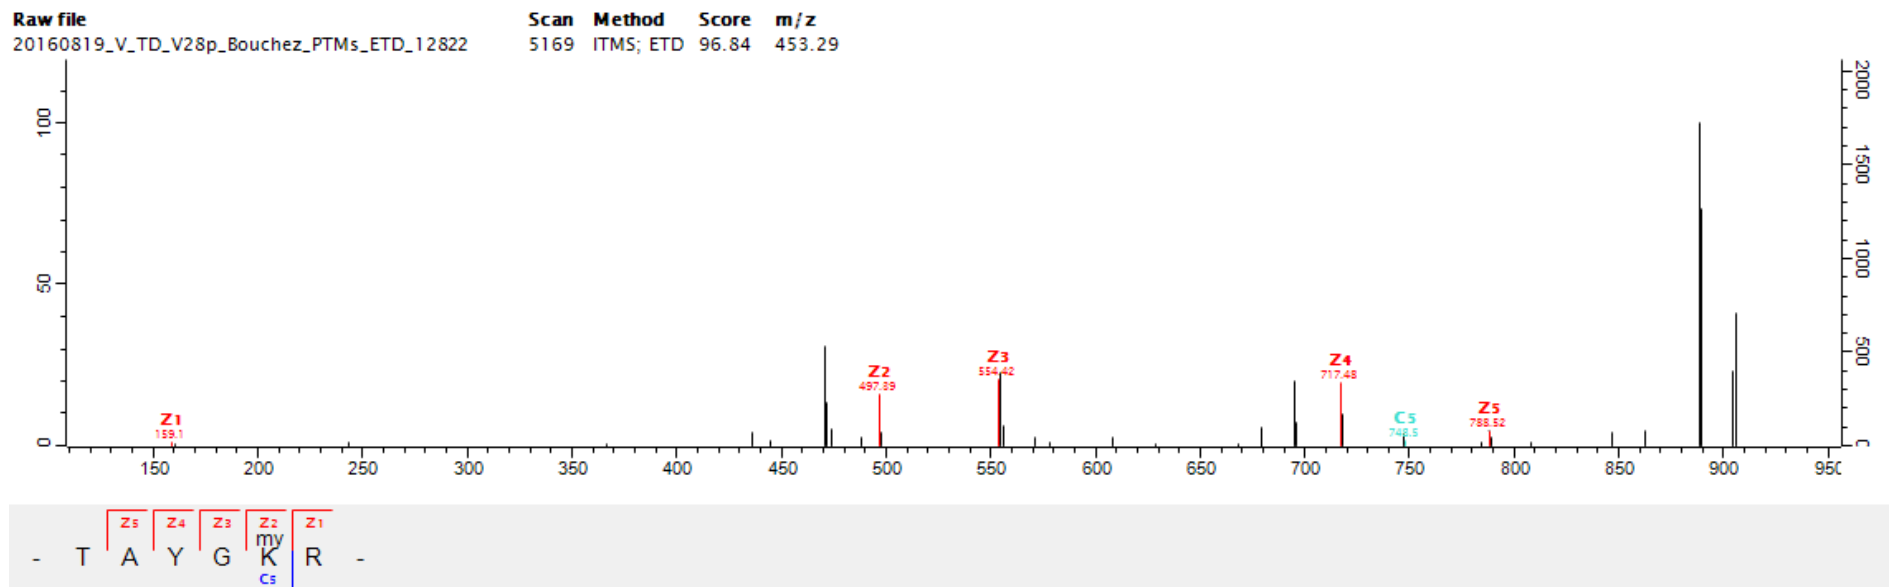

## MS/MS spectrum of the myristoylated lysine K-1017 of Bpp-AC-Hly

Annotated MaxQuant MS/MS spectrum corresponding to the peptide containing the modified Lysine K-1017 with a myristoyl group.

# Bpp K-1017 Palmitoylation – Best MSMS Spectra – BPP1

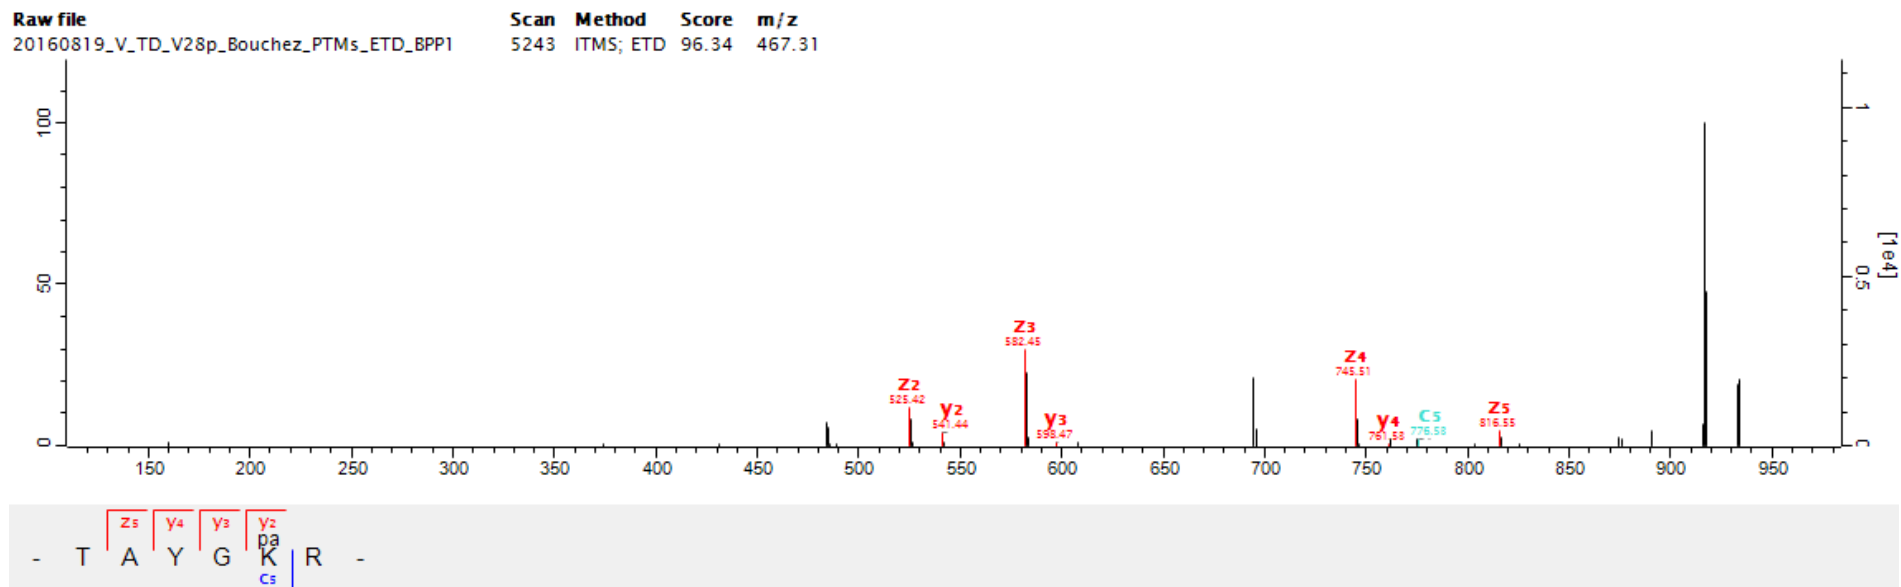

## MS/MS spectrum of the palmitoylated lysine K-1017 of Bpp-AC-Hly

Annotated MaxQuant MS/MS spectrum corresponding to the peptide containing the modified Lysine K-1017 with a palmitoyl group.

# Bpp K-1017 Palmitoylation – MSMS Spectra – 12822

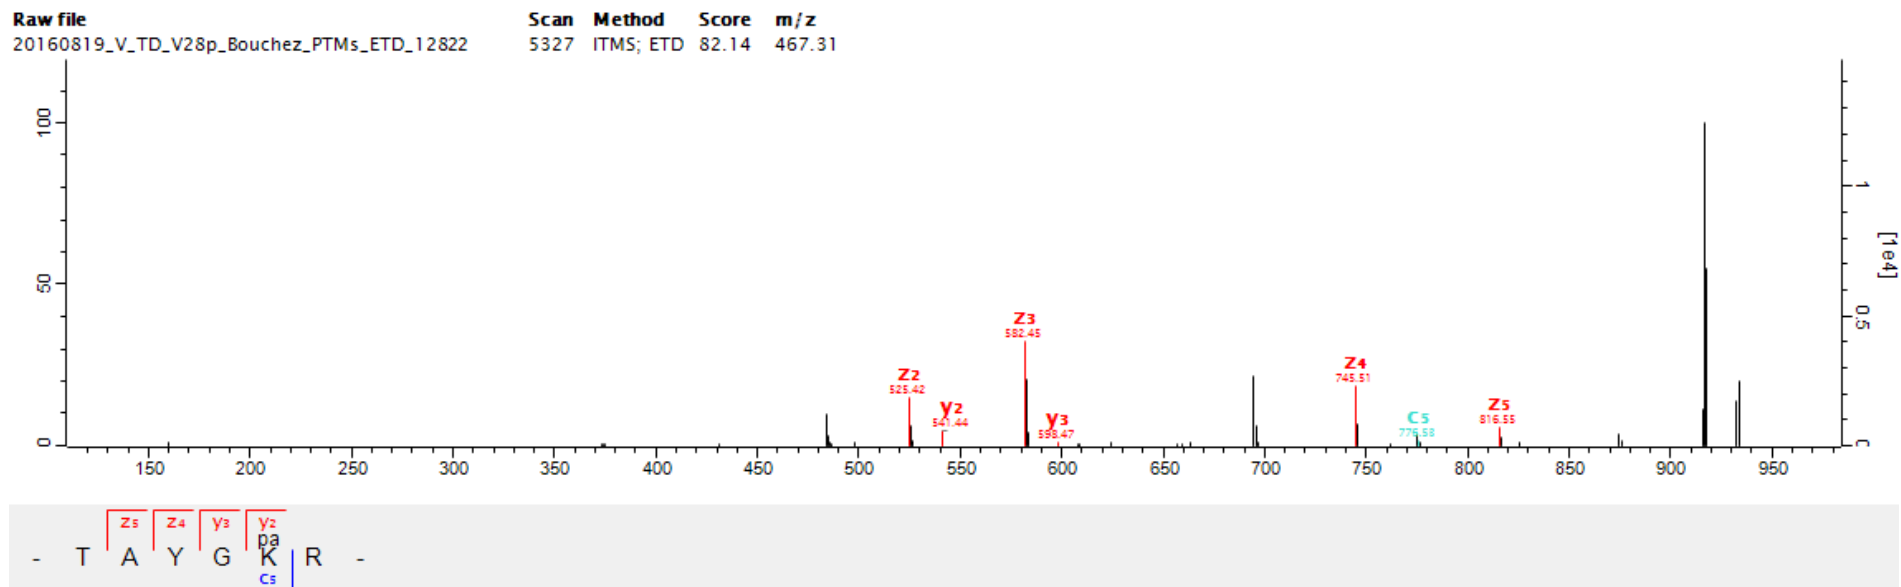

## MS/MS spectrum of the palmitoylated lysine K-1017 of Bpp-AC-Hly

Annotated MaxQuant MS/MS spectrum corresponding to the peptide containing the modified Lysine K-1017 with a palmitoyl group.

# Bpp K-1017 Palmitoylation – Best MSMS Spectra – BPP1

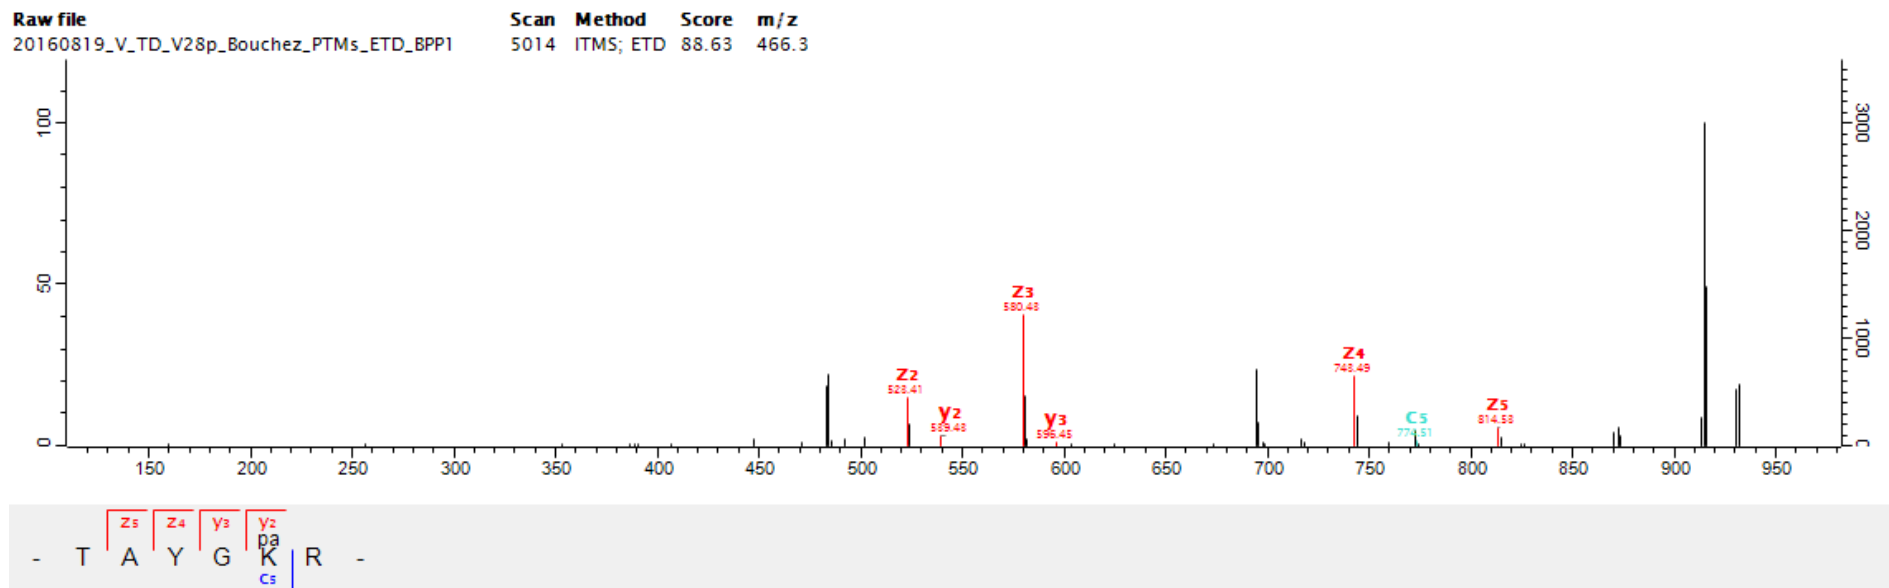

## MS/MS spectrum of the palmitoylated lysine K-1017 of Bpp-AC-Hly

Annotated MaxQuant MS/MS spectrum corresponding to the peptide containing the modified Lysine K-1017 with a palmitoyl group.

# Bpp K-1017 Palmitoylation – MSMS Spectra – 12822

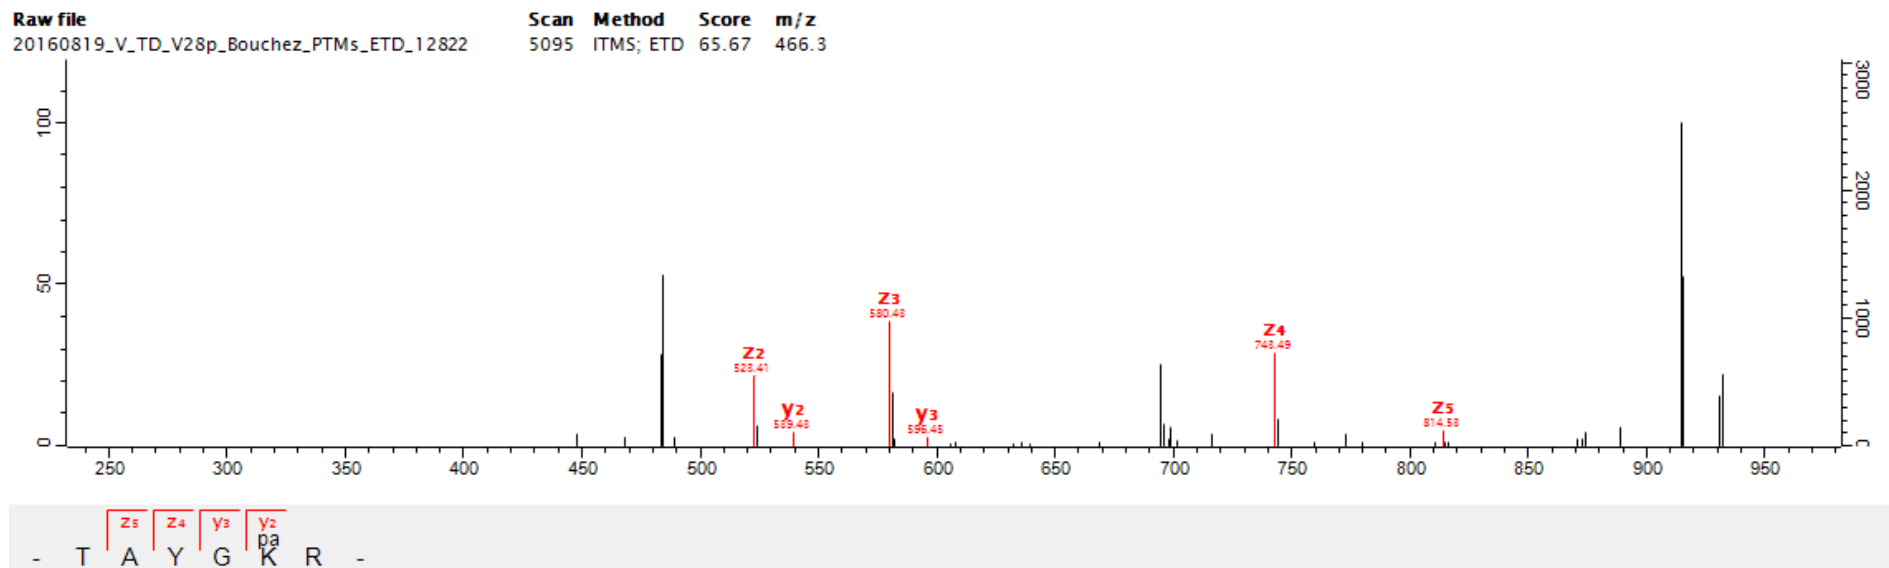

## MS/MS spectrum of the palmitoylated lysine K-1017 of Bpp-AC-Hly

Annotated MaxQuant MS/MS spectrum corresponding to the peptide containing the modified Lysine K-1017 with a palmitoyl group.
