# Supplementary material for: Characterization of Post-Translational Modifications and Cytotoxic Properties of the Adenylate-Cyclase Hemolysin Produced by Various Bordetella pertussis and Bordetella parapertussis Isolates
Source: MDPI journal article supplement (doi:10.3390/toxins9100304), 2017-09-26
Supplement: s1 [file s1]

# Bp K-860 Myristoylation – Best MSMS Spectra – FR5388

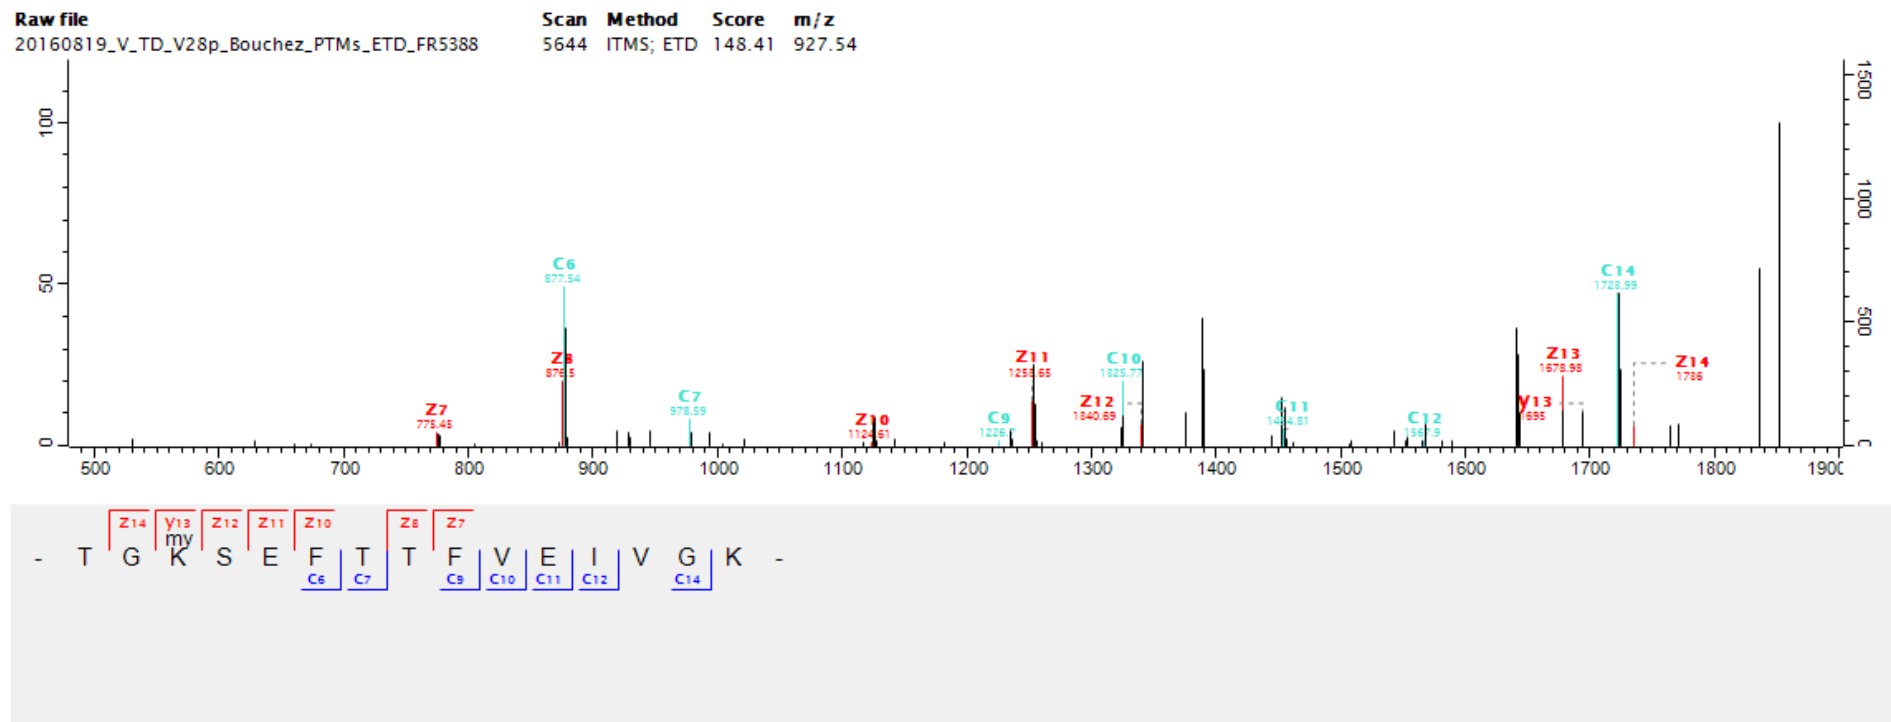

## MS/MS spectrum of the myristoylated lysine K-860 of Bp-AC-Hly

Annotated MaxQuant MS/MS spectrum corresponding to the peptide containing the modified Lysine K-860 with a myristoyl group.

# Bp K-860 Palmitoylation – Best MSMS Spectra – FR5388

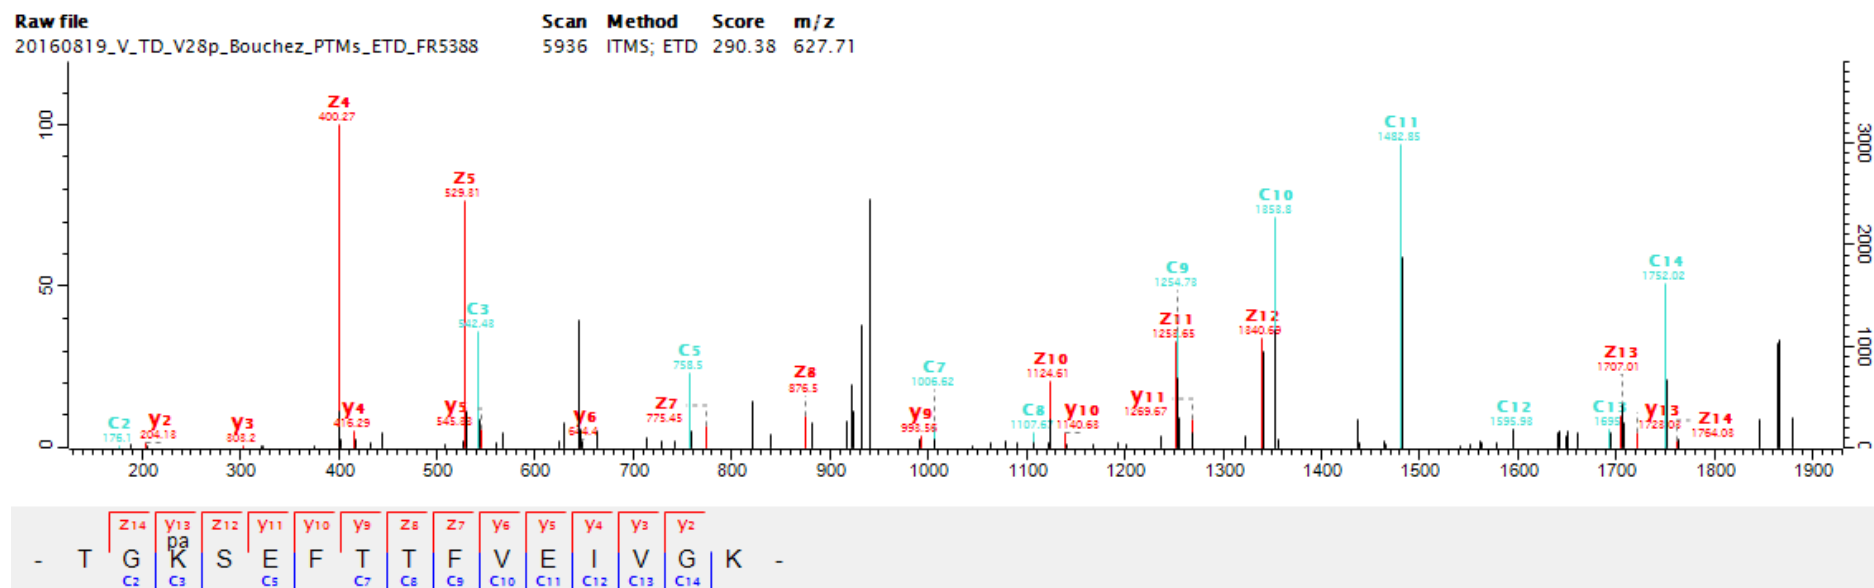

## MS/MS spectrum of the palmitoylated lysine K-860 of Bp-AC-Hly

Annotated MaxQuant MS/MS spectrum corresponding to the peptide containing the modified Lysine K-860 with a palmitoyl group.

# Bp K-860 Palmitoylation – MSMS Spectra – T8132

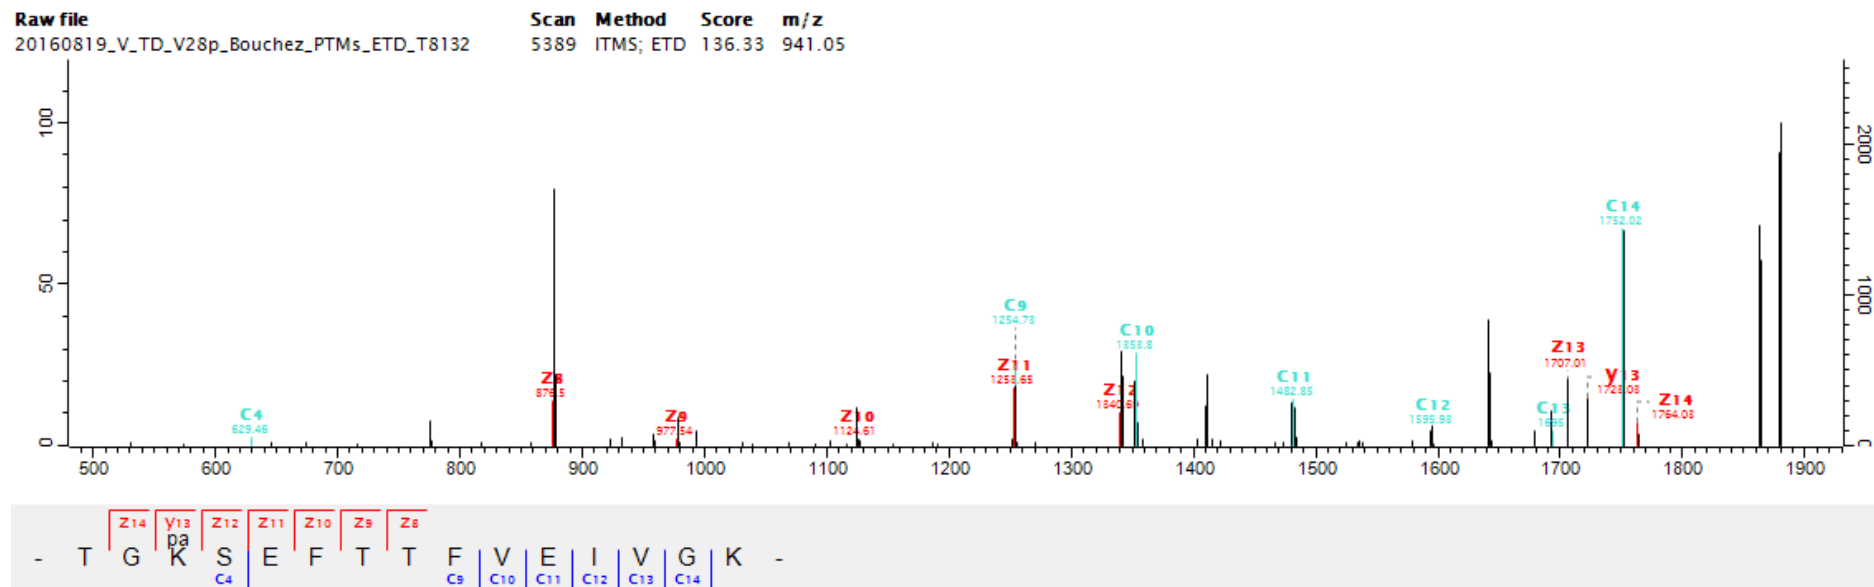

## MS/MS spectrum of the palmitoylated lysine K-860 of Bp-AC-Hly

Annotated MaxQuant MS/MS spectrum corresponding to the peptide containing the modified Lysine K-860 with a palmitoyl group.

# Bp K-860 Unmodified – Best MSMS Spectra – T8132

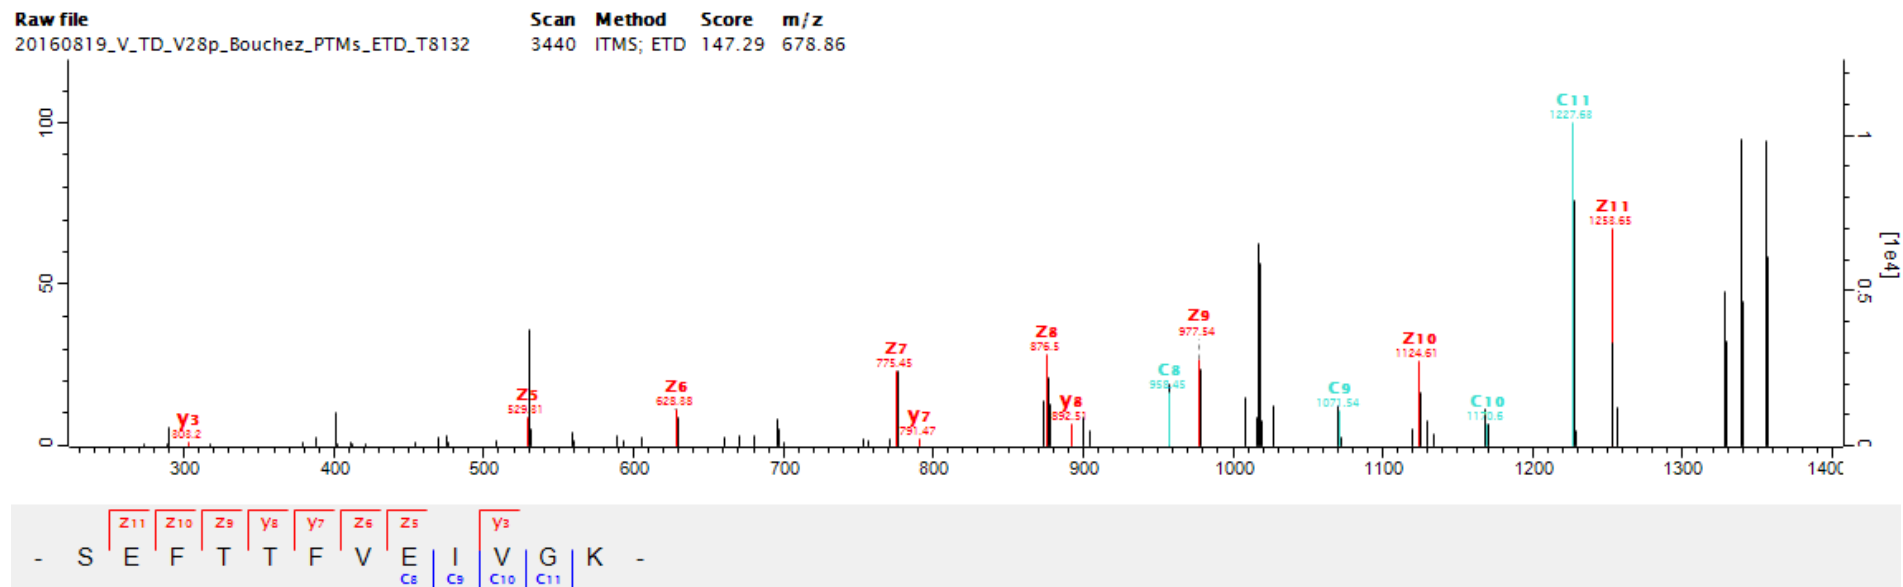

## MS/MS spectrum of the unmodified lysine K-860 of Bp-AC-Hly

Annotated MaxQuant MS/MS spectrum corresponding to the peptide containing the unmodified Lysine K-860.

## Bp K-983 Myristoylation – Best MSMS Spectra – FR4624

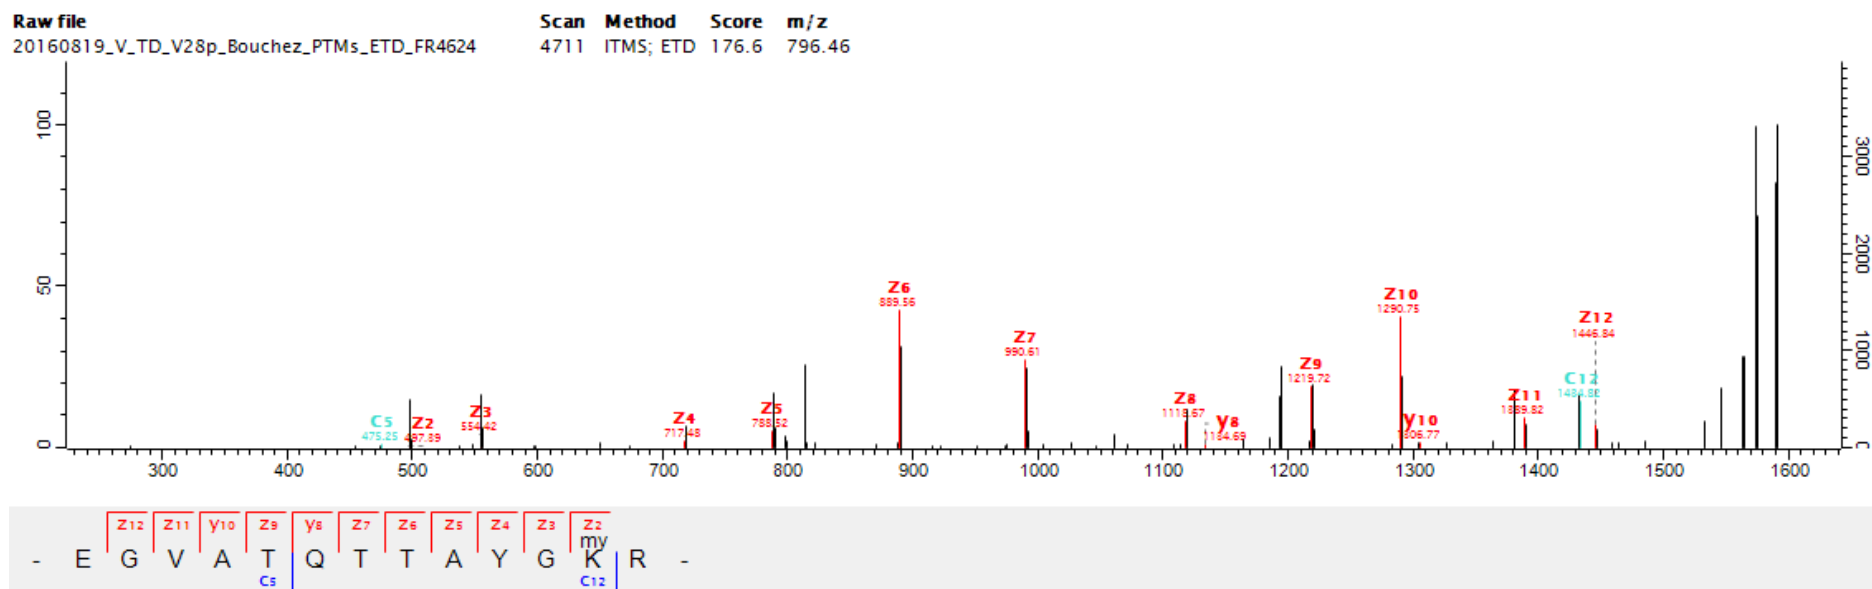

### MS/MS spectrum of the myristoylated lysine K-983 of Bp-AC-Hly

Annotated MaxQuant MS/MS spectrum corresponding to the peptide containing the modified Lysine K-983 with a myristoyl group.

# Bp K-983 Myristoylation – MSMS Spectra – T8132

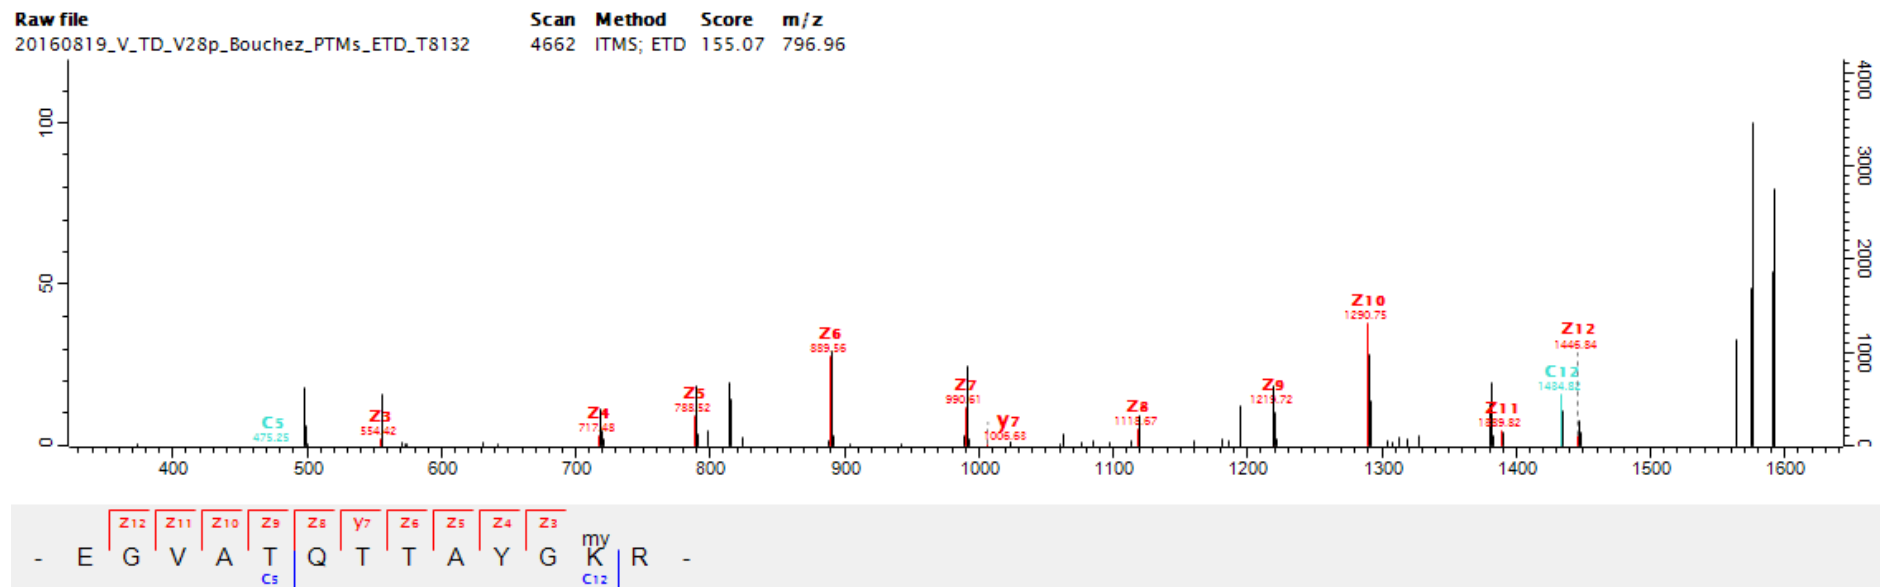

## MS/MS spectrum of the myristoylated lysine K-983 of Bp-AC-Hly

Annotated MaxQuant MS/MS spectrum corresponding to the peptide containing the modified Lysine K-983 with a myristoyl group.

# Bp K-983 Palmitoylation – Best MSMS Spectra – FR5388

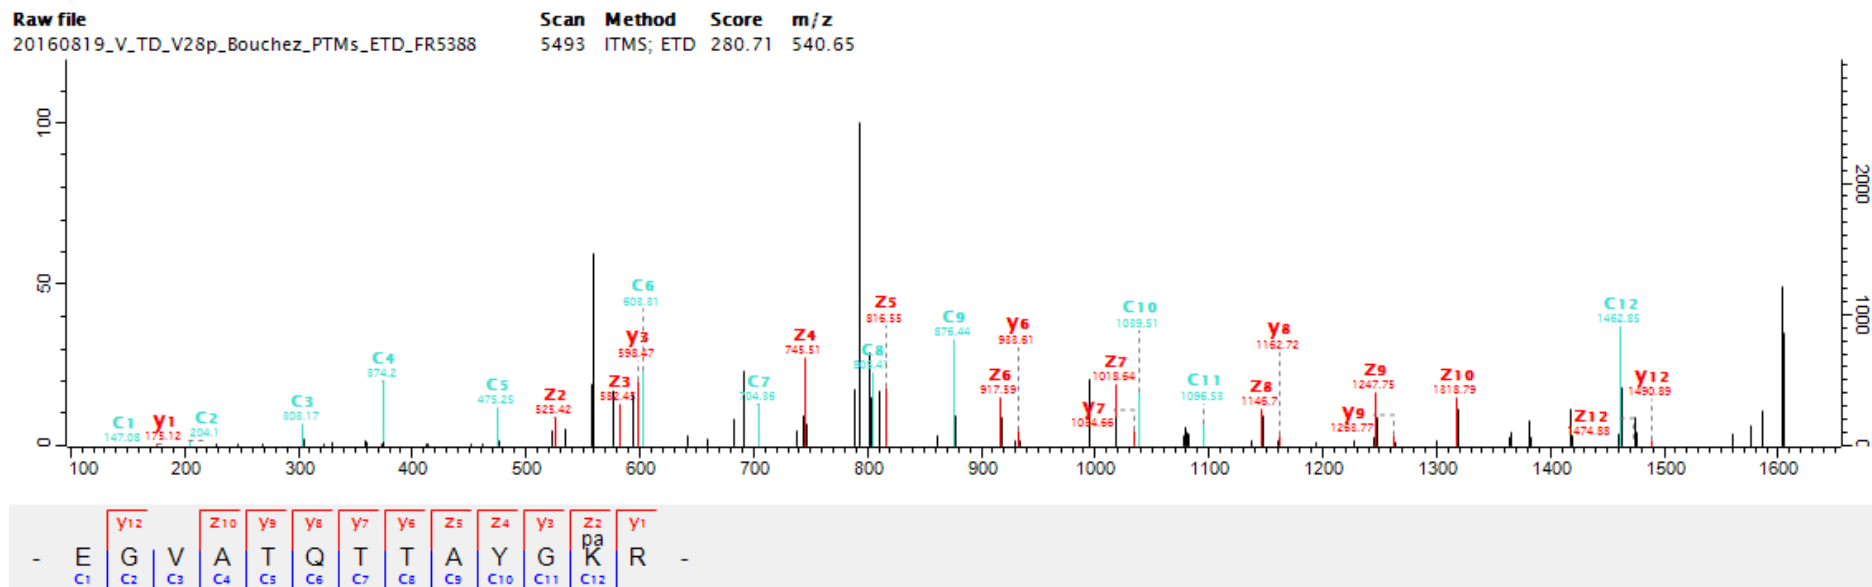

## MS/MS spectrum of the palmitoylated lysine K-983 of Bp-AC-Hly

Annotated MaxQuant MS/MS spectrum corresponding to the peptide containing the modified Lysine K-983 with a palmitoyl group.

# Bp K-983 Palmitoylation – MSMS Spectra – T8132

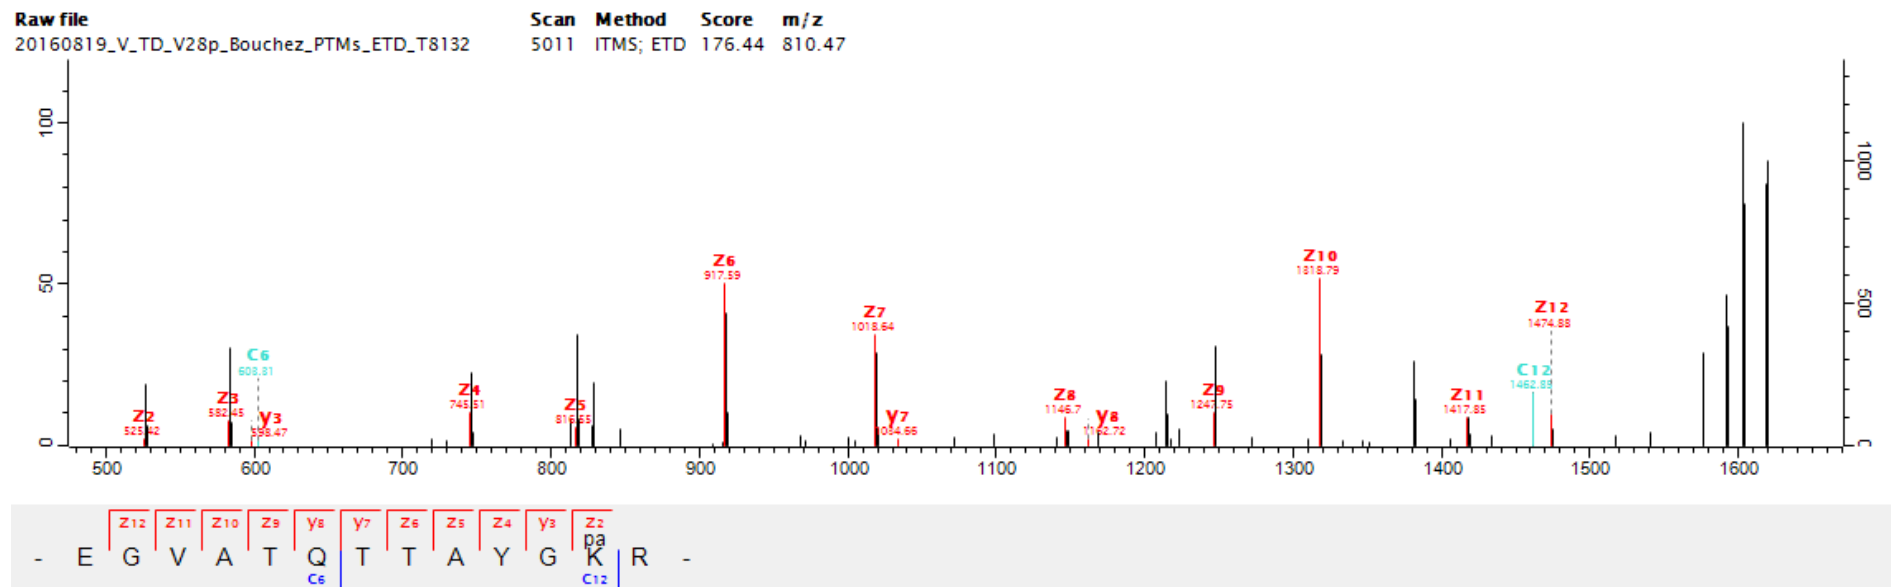

## MS/MS spectrum of the palmitoylated lysine K-983 of Bp-AC-Hly

Annotated MaxQuant MS/MS spectrum corresponding to the peptide containing the modified Lysine K-983 with a palmitoyl group.
