# Supplementary material for: Characterization of Post-Translational Modifications and Cytotoxic Properties of the Adenylate-Cyclase Hemolysin Produced by Various Bordetella pertussis and Bordetella parapertussis Isolates
Source: MDPI journal article supplement (doi:10.3390/toxins9100304), 2017-09-26
Supplement: s1 [file s1]

**Supplementary Figure 1:** Translate - aligned protein sequences BORD005031 (cyaA), Obtained from Locus Explorer - Bordetella MLST locus/sequence definitions (<https://pubmlst.org/bordetella/>)

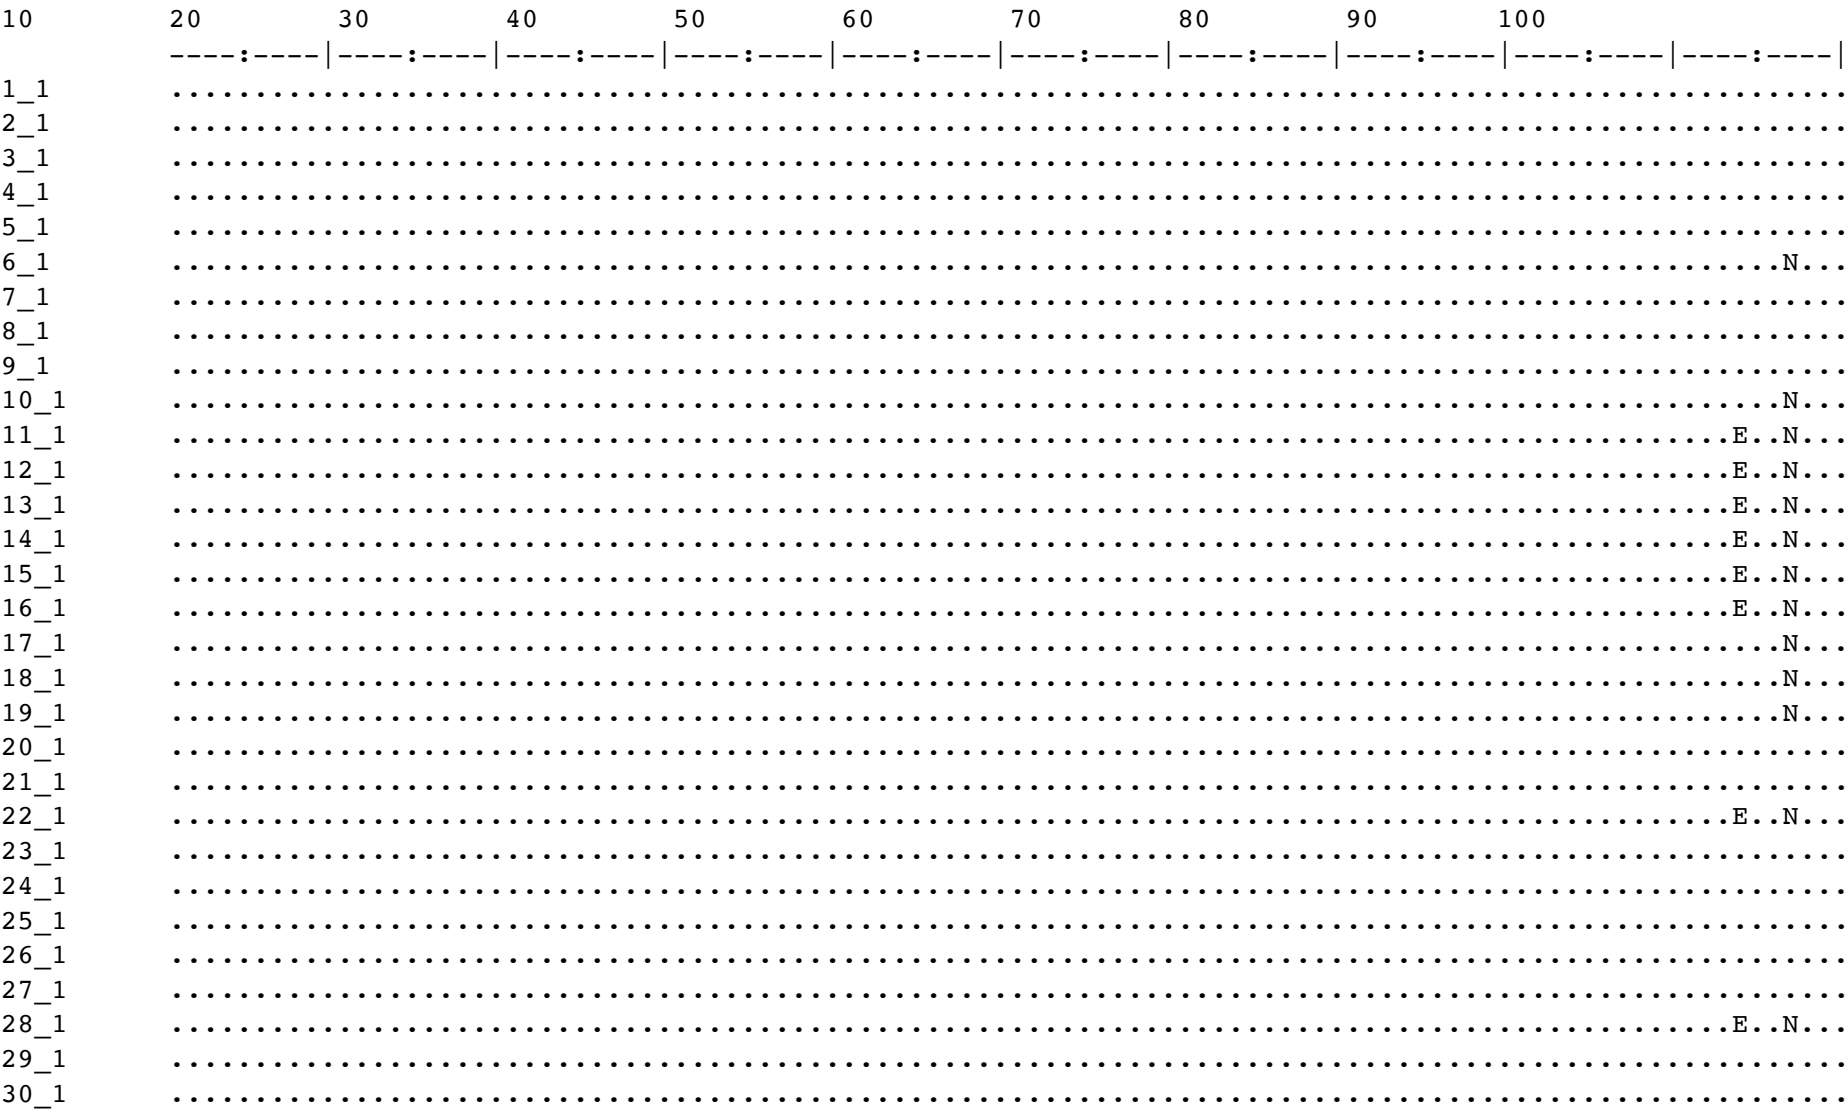

|           |                                                                                                        |
|-----------|--------------------------------------------------------------------------------------------------------|
| 31_1      | .....E..N...                                                                                           |
| 32_1      | .....E..N...                                                                                           |
| 33_1      | .....N...                                                                                              |
| 34_1      | .....E..N...                                                                                           |
| 35_1      | .....N...                                                                                              |
| 36_1      | .....E..N...                                                                                           |
| 37_1      | .....                                                                                                  |
| 38_1      | .....                                                                                                  |
| 39_1      | .....                                                                                                  |
| 40_1      | .....N...                                                                                              |
| 41_1      | .....E..N...                                                                                           |
| 42_1      | .....                                                                                                  |
| 43_1      | .....                                                                                                  |
| 44_1      | .....                                                                                                  |
| 45_1      | .....                                                                                                  |
| 46_1      | .....                                                                                                  |
| 47_1      | .....                                                                                                  |
| Consensus | MQQSHQAGYANAADRESGIPAAVLDGIKAVAKEKNATLMFRLVNPBSTSLIAEGVATKGLGVHAKSSDWGLQAGYIPVNPNL SKLF GRAPEVIARADNDV |
|           | 110 120 130 140 150 160 170 180 190 200                                                                |
|           | ----:---- ----:---- ----:---- ----:---- ----:---- ----:---- ----:---- ----:---- ----:----              |
| 1_1       | .....                                                                                                  |
| 2_1       | .....                                                                                                  |
| 3_1       | .....                                                                                                  |
| 4_1       | .....                                                                                                  |
| 5_1       | .....                                                                                                  |
| 6_1       | .....D.....                                                                                            |
| 7_1       | .....                                                                                                  |

[PubMLST Database home](#) [Contents](#)

|      |             |
|------|-------------|
| 8_1  | .....       |
| 9_1  | .....       |
| 10_1 | .....       |
| 11_1 | .....       |
| 12_1 | .....       |
| 13_1 | .....       |
| 14_1 | .....       |
| 15_1 | .....       |
| 16_1 | .....       |
| 17_1 | .....       |
| 18_1 | .....       |
| 19_1 | .....       |
| 20_1 | .....       |
| 21_1 | .....       |
| 22_1 | .....       |
| 23_1 | .....       |
| 24_1 | .....       |
| 25_1 | .....       |
| 26_1 | .....       |
| 27_1 | .....       |
| 28_1 | .....       |
| 29_1 | .....       |
| 30_1 | .....       |
| 31_1 | .....       |
| 32_1 | .....       |
| 33_1 | .....       |
| 34_1 | .....       |
| 35_1 | .....D..... |
| 36_1 | .....       |
| 37_1 | .....       |
| 38_1 | .....       |
| 39_1 | .....       |
| 40_1 | .....D..... |
| 41_1 | .....       |

|           |                                                                                                      |
|-----------|------------------------------------------------------------------------------------------------------|
| 42_1      | .....                                                                                                |
| 43_1      | .....                                                                                                |
| 44_1      | .....                                                                                                |
| 45_1      | .....                                                                                                |
| 46_1      | .....                                                                                                |
| 47_1      | .....                                                                                                |
| Consensus | NSSLAHGHTAVDLTLSKERLDYLRQAGLVTGMADGVVASNHAGYEQFEFRVKETSDGRYAVQYRRKGGDDFEAVKVIGNAAGIPLTADIDMFAIMPHLSN |
|           | 210 220 230 240 250 260 270 280 290 300                                                              |
|           | ----:---- ----:---- ----:---- ----:---- ----:---- ----:---- ----:---- ----:---- ----:----            |
| 1_1       | .....                                                                                                |
| 2_1       | .....                                                                                                |
| 3_1       | .....                                                                                                |
| 4_1       | .....                                                                                                |
| 5_1       | .....                                                                                                |
| 6_1       | .....E.....                                                                                          |
| 7_1       | .....                                                                                                |
| 8_1       | .....                                                                                                |
| 9_1       | .....                                                                                                |
| 10_1      | .....P.....Q.....                                                                                    |
| 11_1      | .....E.....G.....                                                                                    |
| 12_1      | .....E.....G.....                                                                                    |
| 13_1      | .....E.....                                                                                          |
| 14_1      | .....E.....G.....                                                                                    |
| 15_1      | .....E.....                                                                                          |
| 16_1      | .....E.....G.....                                                                                    |
| 17_1      | .....P.....                                                                                          |
| 18_1      | .....P.....Q.....                                                                                    |
| 19_1      | .....P.....Q.....                                                                                    |
| 20_1      | .....                                                                                                |
| 21_1      | .....                                                                                                |
| 22_1      | .....E.....G.....                                                                                    |
| 23_1      | .....                                                                                                |
| 24_1      | .....                                                                                                |
| 25_1      | .....                                                                                                |

|      |                   |
|------|-------------------|
| 26_1 | .....             |
| 27_1 | .....             |
| 28_1 | .....E.....G..... |
| 29_1 | .....             |
| 30_1 | .....             |
| 31_1 | .....E.....G..... |
| 32_1 | .....E.....       |
| 33_1 | .....E.....       |

[https://pubmlst.org/bigbdb?db=pubmlst\\_bordetella\\_seqdef&page=alleleQuery&locus=BORD005031&submit=1](https://pubmlst.org/bigbdb?db=pubmlst_bordetella_seqdef&page=alleleQuery&locus=BORD005031&submit=1) Page 2 sur 13

Locus Explorer - Bordetella MLST locus/sequence definitions 05/07/2017 12(36

|      |                   |
|------|-------------------|
| 34_1 | .....E.....       |
| 35_1 | .....E.....       |
| 36_1 | .....E.....G..... |
| 37_1 | .....M.....       |
| 38_1 | .....             |
| 39_1 | .....             |
| 40_1 | .....E.....       |
| 41_1 | .....E.....       |
| 42_1 | .....             |
| 43_1 | .....             |
| 44_1 | .....             |
| 45_1 | .....V.....       |
| 46_1 | .....             |
| 47_1 | .....             |

Consensus FRDSARSSVTSGDSVTDYLARTTAAASEATGGLDRERIDLLWKIARAGARSavgTEARRQFRYDGMNIGVITDFELEVARNALNRRRAHAVGAQDVVQHGT

310 320 330 340 350 360 370 380 390 400

----:----|----:----|----:----|----:----|----:----|----:----|----:----|----:----|----:----|

|     |             |
|-----|-------------|
| 1_1 | .....F..... |
| 2_1 | .....G..... |
| 3_1 | .....G..... |
| 4_1 | .....F..... |
| 5_1 | .....G..... |

|      |                   |
|------|-------------------|
| 6_1  | .....T.....       |
| 7_1  | .....F.....       |
| 8_1  | .....F.....       |
| 9_1  | .....F.....       |
| 10_1 | .....T.....       |
| 11_1 | .....T.....S..... |
| 12_1 | .....T.....S..... |
| 13_1 | .....T.....I..... |
| 14_1 | .....T.....S..... |
| 15_1 | .....T.....       |
| 16_1 | .....T.....S..... |
| 17_1 | .....G.....       |
| 18_1 | .....T.....       |
| 19_1 | .....T.....       |
| 20_1 | .....G.....       |
| 21_1 | .....G.....       |
| 22_1 | .....T.....S..... |
| 23_1 | .....             |
| 24_1 | .....             |
| 25_1 | .....G.....       |
| 26_1 | .....             |
| 27_1 | .....G.....       |
| 28_1 | .....T.....S..... |
| 29_1 | .....             |
| 30_1 | .....G.....       |
| 31_1 | .....T.....S..... |
| 32_1 | .....T.....       |
| 33_1 | .....T.....       |
| 34_1 | .....T.....       |
| 35_1 | .....T.....       |
| 36_1 | .....T.....S..... |
| 37_1 | .....G.....       |
| 38_1 | .....             |
| 39_1 | .....G.....       |

```

40_1      .....T.....
41_1      .....I.....
42_1      .....F.....
43_1      .....F.....
44_1      .....F.....
45_1      .....
46_1      .....G.....
47_1      .....F.....
Consensus EQNNPFPEADEKIFVVSATGESQMLTRGQLKEYIGQQRGEGYVFYENRAYGVAGKSLFDDGLGAAPGVPSGRSKSSPDVLETVPASPLRRPSLGAVERO
          410      420      430      440      450      460      470      480      490      500
-----:-----|-----:-----|-----:-----|-----:-----|-----:-----|-----:-----|-----:-----|-----:-----|
1_1      .....
2_1      .....
3_1      .....
4_1      .....
5_1      .....
6_1      .....V.....P.....L.....S.K.V.....
7_1      .....
8_1      .....

```

[https://pubmlst.org/bigdb?db=pubmlst\\_bordetella\\_seqdef&page=alleleQuery&locus=BORD005031&submit=1](https://pubmlst.org/bigdb?db=pubmlst_bordetella_seqdef&page=alleleQuery&locus=BORD005031&submit=1) Page 3 sur 13

Locus Explorer - Bordetella MLST locus/sequence definitions 05/07/2017 12:36

```

9_1      .....
10_1     .....K...T.....
11_1     .....L.....M.D.....V.....P.....L.....K.V.....G.....
12_1     .....L.....D.....V.....V.....P.....L.....K.V.....G.....
13_1     .....V.....P.....L.....S.K.V.....
14_1     .....L.....D.....V.....V.....P.....L.....K.V.A.....G.....
15_1     .....G.....V.....P.....L.....S.K.V.....A.....
16_1     .....L.....M.D.....V.....P.....L.....K.V.....G.....
17_1     .....
18_1     .....K...T.....
19_1     .....K...T.....

```

|           |                                                                                                                                                                                                                                                                                                                                                                               |
|-----------|-------------------------------------------------------------------------------------------------------------------------------------------------------------------------------------------------------------------------------------------------------------------------------------------------------------------------------------------------------------------------------|
| 20_1      | .....                                                                                                                                                                                                                                                                                                                                                                         |
| 21_1      | .....                                                                                                                                                                                                                                                                                                                                                                         |
| 22_1      | .....L.....M.D.....V.....V....P.....L....S.K.V.....                                                                                                                                                                                                                                                                                                                           |
| 23_1      | .....                                                                                                                                                                                                                                                                                                                                                                         |
| 24_1      | .....K...T.....                                                                                                                                                                                                                                                                                                                                                               |
| 25_1      | .....                                                                                                                                                                                                                                                                                                                                                                         |
| 26_1      | .....                                                                                                                                                                                                                                                                                                                                                                         |
| 27_1      | .....                                                                                                                                                                                                                                                                                                                                                                         |
| 28_1      | .....L.....D.....V.....V....P.....L....K.V.....G.....                                                                                                                                                                                                                                                                                                                         |
| 29_1      | .....                                                                                                                                                                                                                                                                                                                                                                         |
| 30_1      | .....                                                                                                                                                                                                                                                                                                                                                                         |
| 31_1      | .....L.....M.D.....V.....P.....L....K.V.....G.....                                                                                                                                                                                                                                                                                                                            |
| 32_1      | .....G.....V.....P.....L....S.K.V.....A.....                                                                                                                                                                                                                                                                                                                                  |
| 33_1      | .....V.....P.....L....S.K.V.....                                                                                                                                                                                                                                                                                                                                              |
| 34_1      | .....G.....V.....P.....L....S.K.V.....G.....                                                                                                                                                                                                                                                                                                                                  |
| 35_1      | .....V.....P.....L....S.K.V.....                                                                                                                                                                                                                                                                                                                                              |
| 36_1      | .....L.....D.....V.....V....P.....L....K.V.....G.....                                                                                                                                                                                                                                                                                                                         |
| 37_1      | .....H.....                                                                                                                                                                                                                                                                                                                                                                   |
| 38_1      | .....                                                                                                                                                                                                                                                                                                                                                                         |
| 39_1      | .....                                                                                                                                                                                                                                                                                                                                                                         |
| 40_1      | .....V.....P.....L....S.K.V.....                                                                                                                                                                                                                                                                                                                                              |
| 41_1      | .....V.....P.....L....S.K.V.....                                                                                                                                                                                                                                                                                                                                              |
| 42_1      | .....G.....                                                                                                                                                                                                                                                                                                                                                                   |
| 43_1      | .....                                                                                                                                                                                                                                                                                                                                                                         |
| 44_1      | .....                                                                                                                                                                                                                                                                                                                                                                         |
| 45_1      | .....                                                                                                                                                                                                                                                                                                                                                                         |
| 46_1      | .....                                                                                                                                                                                                                                                                                                                                                                         |
| 47_1      | .....                                                                                                                                                                                                                                                                                                                                                                         |
| Consensus | DSGYDSL <sup>510</sup> DGVGSR <sup>520</sup> SFSLGEVSDMAA <sup>530</sup> VEAAELEMTRQVLHAGARQDDAEPGVSGASAHWGQ <sup>540</sup> RALQGAQAVAAAQRLV <sup>550</sup> HAIALMTQFGRAGSTNTPQEAA <sup>560</sup> SL <sup>570</sup><br>-----:----- -----:----- -----:----- -----:----- -----:----- -----:----- -----:----- -----:----- -----:----- <br>1_1.....<br>2_1.....<br>3_1.....V..... |

|      |             |
|------|-------------|
| 4_1  | .....V..... |
| 5_1  | .....V..... |
| 6_1  | .....       |
| 7_1  | .....       |
| 8_1  | .....       |
| 9_1  | .....       |
| 10_1 | .....L..... |
| 11_1 | .....       |
| 12_1 | .....       |
| 13_1 | .....       |
| 14_1 | .....       |
| 15_1 | .....       |
| 16_1 | .....       |
| 17_1 | .....       |
| 18_1 | .....L..... |
| 19_1 | .....L..... |
| 20_1 | .....       |
| 21_1 | .....       |
| 22_1 | .....       |
| 23_1 | .....       |
| 24_1 | .....L..... |
| 25_1 | .....       |
| 26_1 | .....       |
| 27_1 | .....       |
| 28_1 | .....       |
| 29_1 | .....       |
| 30_1 | .....       |
| 31_1 | .....       |
| 32_1 | .....       |
| 33_1 | .....       |
| 34_1 | .....       |

[https://pubmlst.org/bigsdb?db=pubmlst\\_bordetella\\_seqdef&page=alleleQuery&locus=BORD005031&submit=1](https://pubmlst.org/bigsdb?db=pubmlst_bordetella_seqdef&page=alleleQuery&locus=BORD005031&submit=1) Page 4 sur 13

|           |                                                                                                       |
|-----------|-------------------------------------------------------------------------------------------------------|
| 35_1      | .....                                                                                                 |
| 36_1      | .....                                                                                                 |
| 37_1      | .....S.....                                                                                           |
| 38_1      | .....                                                                                                 |
| 39_1      | .....V.....                                                                                           |
| 40_1      | .....                                                                                                 |
| 41_1      | .....                                                                                                 |
| 42_1      | .....                                                                                                 |
| 43_1      | .....                                                                                                 |
| 44_1      | .....                                                                                                 |
| 45_1      | .....                                                                                                 |
| 46_1      | .....                                                                                                 |
| 47_1      | .....                                                                                                 |
| Consensus | SAAVFGLGEASSAVAETVSGFFRGSSRWAGGFGVAGGAMALGGGIAAAVGAGMSLTDDAPAGQKAAAGAEIALQLTG GTVELASSIALALAAARGVTSGL |
|           | 610      620      630      640      650      660      670      680      690      700                  |
|           | ----:---- ----:---- ----:---- ----:---- ----:---- ----:---- ----:---- ----:---- ----:----             |
| 1_1       | .....                                                                                                 |
| 2_1       | .....                                                                                                 |
| 3_1       | .....                                                                                                 |
| 4_1       | .....                                                                                                 |
| 5_1       | .....                                                                                                 |
| 6_1       | .....                                                                                                 |
| 7_1       | .....                                                                                                 |
| 8_1       | .....                                                                                                 |
| 9_1       | .....                                                                                                 |
| 10_1      | .....S.....                                                                                           |
| 11_1      | .....                                                                                                 |
| 12_1      | .....                                                                                                 |
| 13_1      | .....                                                                                                 |
| 14_1      | .....                                                                                                 |
| 15_1      | .....                                                                                                 |
| 16_1      | .....A.....                                                                                           |
| 17_1      | .....                                                                                                 |
| 18_1      | .....S.....                                                                                           |

| Accession | Sequence                                                                                             |
|-----------|------------------------------------------------------------------------------------------------------|
| 19_1      | .....S.....                                                                                          |
| 20_1      | .....                                                                                                |
| 21_1      | .....                                                                                                |
| 22_1      | .....                                                                                                |
| 23_1      | .....                                                                                                |
| 24_1      | .....S.....                                                                                          |
| 25_1      | .....                                                                                                |
| 26_1      | .....                                                                                                |
| 27_1      | .....                                                                                                |
| 28_1      | .....                                                                                                |
| 29_1      | .....T.....                                                                                          |
| 30_1      | .....                                                                                                |
| 31_1      | ....A.....                                                                                           |
| 32_1      | .....                                                                                                |
| 33_1      | .....                                                                                                |
| 34_1      | .....                                                                                                |
| 35_1      | .....                                                                                                |
| 36_1      | ....A.....                                                                                           |
| 37_1      | .....                                                                                                |
| 38_1      | .....                                                                                                |
| 39_1      | .....                                                                                                |
| 40_1      | .....                                                                                                |
| 41_1      | .....                                                                                                |
| 42_1      | .....                                                                                                |
| 43_1      | .....                                                                                                |
| 44_1      | .....                                                                                                |
| 45_1      | .....T.....                                                                                          |
| 46_1      | .....                                                                                                |
| 47_1      | .....                                                                                                |
| Consensus | QVAGASAGAAAGALAAALSPMEIYGLVQQSHYADQLDKLAQESSAYGYEGDALLAQLYRDKTAAEGAVAGVSAVLSTVGAAVSIAAAASVVGAPVAVVTS |
|           | 710 720 730 740 750 760 770 780 790 800                                                              |
|           | ----:---- ----:---- ----:---- ----:---- ----:---- ----:---- ----:---- ----:---- ----:---- ----:----  |
| 1_1       | .....                                                                                                |
| 2_1       | .....A                                                                                               |

|     |        |
|-----|--------|
| 3_1 | .....A |
| 4_1 | .....  |
| 5_1 | .....A |
| 6_1 | .....  |
| 7_1 | .....  |
| 8_1 | .....  |
| 9_1 | .....  |

[https://pubmlst.org/bigbdb?db=pubmlst\\_bordetella\\_seqdef&page=alleleQuery&locus=BORD005031&submit=1](https://pubmlst.org/bigbdb?db=pubmlst_bordetella_seqdef&page=alleleQuery&locus=BORD005031&submit=1) Page 5 sur 13

Locus Explorer - Bordetella MLST locus/sequence definitions 05/07/2017 12/36

|      |             |
|------|-------------|
| 10_1 | .....A      |
| 11_1 | .....       |
| 12_1 | .....       |
| 13_1 | .....       |
| 14_1 | .....       |
| 15_1 | .....       |
| 16_1 | .....       |
| 17_1 | .....A      |
| 18_1 | .....S..... |
| 19_1 | .....S..... |
| 20_1 | .....A      |
| 21_1 | .....A      |
| 22_1 | .....       |
| 23_1 | .....A      |
| 24_1 | .....S..... |
| 25_1 | .....A      |
| 26_1 | .....A      |
| 27_1 | .....A      |
| 28_1 | .....       |
| 29_1 | .....A      |
| 30_1 | .....A      |
| 31_1 | .....       |
| 32_1 | .....       |

|           |                                                                                                                          |
|-----------|--------------------------------------------------------------------------------------------------------------------------|
| 33_1      | .....                                                                                                                    |
| 34_1      | .....                                                                                                                    |
| 35_1      | .....                                                                                                                    |
| 36_1      | .....                                                                                                                    |
| 37_1      | .....A                                                                                                                   |
| 38_1      | .....A                                                                                                                   |
| 39_1      | .....A                                                                                                                   |
| 40_1      | .....                                                                                                                    |
| 41_1      | .....                                                                                                                    |
| 42_1      | .....                                                                                                                    |
| 43_1      | .....                                                                                                                    |
| 44_1      | .....                                                                                                                    |
| 45_1      | .....A                                                                                                                   |
| 46_1      | .....A                                                                                                                   |
| 47_1      | .....                                                                                                                    |
| Consensus | LLTGALNGILRGVQQPIIEKLANDYARKIDELGGPQAYFEKNLQARHEQLANS DGLRKMLADLQAGWNASSVIGVQTTEISKSALELAAITGNADNLKSV                    |
|           | 810          820          830          840          850          860          870          880          890          900 |
|           | ----:---- ----:---- ----:---- ----:---- ----:---- ----:---- ----:---- ----:---- ----:----                                |
| 1_1       | .....                                                                                                                    |
| 2_1       | .....I.....                                                                                                              |
| 3_1       | .....I.....                                                                                                              |
| 4_1       | .....                                                                                                                    |
| 5_1       | .....I.....                                                                                                              |
| 6_1       | .....                                                                                                                    |
| 7_1       | .....                                                                                                                    |
| 8_1       | .....                                                                                                                    |
| 9_1       | .....M.....                                                                                                              |
| 10_1      | .....I.....                                                                                                              |
| 11_1      | .....                                                                                                                    |
| 12_1      | .....                                                                                                                    |
| 13_1      | .....                                                                                                                    |
| 14_1      | .....                                                                                                                    |
| 15_1      | .....                                                                                                                    |
| 16_1      | .....                                                                                                                    |

|      |             |
|------|-------------|
| 17_1 | .....I..... |
| 18_1 | .....I..... |
| 19_1 | .....I..... |
| 20_1 | .....I..... |
| 21_1 | .....I..... |
| 22_1 | .....       |
| 23_1 | .....I..... |
| 24_1 | .....I..... |
| 25_1 | .....I..... |
| 26_1 | .....I..... |
| 27_1 | .....I..... |
| 28_1 | .....       |
| 29_1 | .....I..... |
| 30_1 | .....I..... |
| 31_1 | .....       |
| 32_1 | .....       |
| 33_1 | .....       |
| 34_1 | .....       |
| 35_1 | .....       |

[https://pubmlst.org/bigsdbs?db=pubmlst\\_bordetella\\_seqdef&page=alleleQuery&locus=BORD005031&submit=1](https://pubmlst.org/bigsdbs?db=pubmlst_bordetella_seqdef&page=alleleQuery&locus=BORD005031&submit=1) Page 6 sur 13

Locus Explorer - Bordetella MLST locus/sequence definitions 05/07/2017 12:36

|      |             |
|------|-------------|
| 36_1 | .....       |
| 37_1 | .....I..... |
| 38_1 | .....I..... |
| 39_1 | .....I..... |
| 40_1 | .....       |
| 41_1 | .....       |
| 42_1 | .....       |
| 43_1 | .....       |
| 44_1 | .....       |
| 45_1 | .....I..... |
| 46_1 | .....I..... |

```

47_1 .....
Consensus DVFVDRFVQGERVAGQPVVLDVAAGGIDIASRKGERPALTFITPLAAPGEEQRRRTKTGKSEFTTFVEIVGKQDRWRIRDGAADTTIDLAKVVSQQLVDAN
          910      920      930      940      950      960      970      980      990      1000
-----:-----|-----:-----|-----:-----|-----:-----|-----:-----|-----:-----|-----:-----|-----:-----|
1_1 .....
2_1 .....E.....K.....
3_1 .....E.....K.....
4_1 .....
5_1 .....E.....K.....
6_1 .....
7_1 .....
8_1 .....
9_1 .....
10_1 .....I.....E.....K.....
11_1 .....
12_1 .....
13_1 .....S.....
14_1 .....
15_1 .....S.....
16_1 .....
17_1 .....E.....I.....E.....K.....
18_1 .....I.....E.....K.....
19_1 .....I.....E.....K.....
20_1 .....E.....K.....
21_1 .....E.....K.....
22_1 .....S.....
23_1 .....E.....K.....
24_1 .....I.....E.....K.....
25_1 .....E.....K.....
26_1 .....E.....K.....
27_1 .....E.....K.....
28_1 .....
29_1 .....E.....K.....
30_1 .....E.....K.....

```

```

31_1 .....
32_1 .....S.....
33_1 .....S.....
34_1 .....
35_1 .....
36_1 .....
37_1 .....K.....
38_1 .....E.....K.....
39_1 .....E.....K.....
40_1 .....
41_1 .....S.....
42_1 .....
43_1 .....
44_1 .....
45_1 .....E.....K.....
46_1 .....E.....K.....
47_1 .....
Consensus GVLKHSIKLDVIGGDGDDVVLANASRIHYDGGAGTNTVSYAALGRQDSITVSADGERFNVRKQLNNANVYREGVATQTTAYGKRTENVQYRHVELARVGQ
          1010      1020      1030      1040      1050      1060      1070      1080      1090      1100
-----:-----|-----:-----|-----:-----|-----:-----|-----:-----|-----:-----|-----:-----|-----:-----|
1_1  V.....Q.....
2_1  .....A.....H..V.....
3_1  .....A.....H..V.....
4_1  .....Q.....
5_1  .....A.....H..V.....
6_1  .....Q.....
7_1  .....Q.....
8_1  .....Q.....
9_1  .....Q.....
10_1 .....A.....A..H.....

```

[https://pubmlst.org/bigsdb?db=pubmlst\\_bordetella\\_seqdef&page=alleleQuery&locus=BORD005031&submit=1](https://pubmlst.org/bigsdb?db=pubmlst_bordetella_seqdef&page=alleleQuery&locus=BORD005031&submit=1) Page 7 sur 13

|      |                             |
|------|-----------------------------|
| 11_1 | .....Q.....                 |
| 12_1 | .....Q.....                 |
| 13_1 | .....Q.....                 |
| 14_1 | .....Q.....                 |
| 15_1 | .....Q.....                 |
| 16_1 | .....Q.....                 |
| 17_1 | .....A.....H...V.....       |
| 18_1 | .....A.....A...H.....       |
| 19_1 | .....A.....A...H.....       |
| 20_1 | .....A.....H...V.....       |
| 21_1 | .....A.....H...V.....       |
| 22_1 | .....Q.....                 |
| 23_1 | .....A.....H...V.....       |
| 24_1 | .....A.....A...H.....       |
| 25_1 | .....A.....H...V.....       |
| 26_1 | .....A.....H...V.....       |
| 27_1 | .....A.....H...V.....       |
| 28_1 | .....Q.....                 |
| 29_1 | .....A.....H...V.....       |
| 30_1 | .....A.....H...V.....       |
| 31_1 | .....Q.....L.....           |
| 32_1 | .....Q.....                 |
| 33_1 | .....Q.....                 |
| 34_1 | .....Q.....                 |
| 35_1 | .....Q.....                 |
| 36_1 | .....Q.....                 |
| 37_1 | .....A.....H...V.....N..... |
| 38_1 | .....A.....H...V.....       |
| 39_1 | .....A.....H...V.....       |
| 40_1 | .....Q.....                 |
| 41_1 | .....Q.....                 |
| 42_1 | .....Q.....                 |
| 43_1 | .....G.....Q.....           |
| 44_1 | .....Q.....                 |

```

45_1      .....A.....H..V.....
46_1      .....A.....H..V.....
47_1      .....Q.....
Consensus LVEVDTL1110EHVQHI1120IIGGAGNDSITGNAHDN1130FLAGGSGDDRLDGGAGND1140TLVGGE1150GxNTVIGGAGDD1160VFLQDLGV1170WSNQLDGGAGV1180DTVKYN1190VHQPS1200EERLE
          1110      1120      1130      1140      1150      1160      1170      1180      1190      1200
          ----:----|----:----|----:----|----:----|----:----|----:----|----:----|----:----|----:----|
1_1        .....Q.....
2_1        .....S..S.....D.....H.....
3_1        .....S..S.....D.....H.....
4_1        .....Q.....
5_1        .....TS..S.....D.....H.....
6_1        .....
7_1        .....Q.....
8_1        .....Q.....
9_1        .....Q.....
10_1       .....N.....L.....S..S.....D.....
11_1       .....V.....
12_1       .....V.....
13_1       .....Q.....
14_1       .....V.....
15_1       .....Q.....
16_1       .....V.....W.....
17_1       ...E.....S..S.....D.....H.....
18_1       .....N.....L.....S..S.....D.....
19_1       .....L.....S..S.....D.....H.....
20_1       .....S..S.....D.....H.....D.....
21_1       ...E.....S..S.....D.....H.....
22_1       .....V.....
23_1       ...E.....S..S.....D.....H.....
24_1       .....N.....L.....S..S.....D.....
25_1       .....S..S.....D.....H.....
26_1       ...E.....S..S.....D.....H.....
27_1       ...E.....S..S.....D.....H.....
28_1       .....V.....

```

```

29_1      ...E.....S..S.....D.....H.....
30_1      ...E.....S..S.....D.....H.....
31_1      .....Q.....
32_1      .....
33_1      .....
34_1      .....V.....
35_1      .....
36_1      .....V.....

```

[https://pubmlst.org/bigsdbs/db=pubmlst\\_bordetella\\_seqdef&page=alleleQuery&locus=BORD005031&submit=1](https://pubmlst.org/bigsdbs/db=pubmlst_bordetella_seqdef&page=alleleQuery&locus=BORD005031&submit=1) Page 8 sur 13

Locus Explorer - Bordetella MLST locus/sequence definitions 05/07/2017 12:36

```

37_1      .....S..S.....D.....H.....
38_1      .....S..S.....D.....H.....
39_1      ...E.....S..S.....D.....H.....
40_1      .....
41_1      .....Q.....
42_1      .....Q.....
43_1      .....Q.....
44_1      .....Q.....
45_1      ...E.....S..S.....D.....H.....
46_1      ...E.....S..S.....D.....H.....
47_1      .....Q.....

```

Consensus RMGDTGIHADLQKGTVEKWPALNLFSDHVKNIENLHGSRLNDRIAGDDRDNELWGHGNDTIRGRGGDDILRGGLGLDTLYGEDGNDIFLQDDETVSDD

```

          1210      1220      1230      1240      1250      1260      1270      1280      1290      1300
-----:-----|-----:-----|-----:-----|-----:-----|-----:-----|-----:-----|-----:-----|-----:-----|

```

```

1_1      .....
2_1      .....A.K.....EG....ARR.M....S..S.....
3_1      .....A.K.....EG....ARR.MG...S..S.....
4_1      .....
5_1      .....A.K.....EG....ARR.MG...S..S.....
6_1      .....
7_1      .....
8_1      .....

```

|      |                                                    |
|------|----------------------------------------------------|
| 9_1  | .....                                              |
| 10_1 | .....A.K.....S.....                                |
| 11_1 | .....                                              |
| 12_1 | .....S.....D.....                                  |
| 13_1 | .....                                              |
| 14_1 | .....S.....D.....                                  |
| 15_1 | .....                                              |
| 16_1 | .....S.....                                        |
| 17_1 | .....A.K.....S.....                                |
| 18_1 | .....A.K.....S.....                                |
| 19_1 | .....A.K.....S.....                                |
| 20_1 | .....Q.....T.L..A.E.....EG.....ARR.M.....S..S..... |
| 21_1 | .....A.K.....S.....                                |
| 22_1 | .....                                              |
| 23_1 | .....A.K.....S.....                                |
| 24_1 | .....A.K.....S.....                                |
| 25_1 | .....A.K.....EG.....ARR.M.....S..S.....            |
| 26_1 | .....A.K.....S.....                                |
| 27_1 | .....A.K.....S.....                                |
| 28_1 | .....                                              |
| 29_1 | .....A.K.....S.....                                |
| 30_1 | .....A.K.....S.....                                |
| 31_1 | .....                                              |
| 32_1 | .....                                              |
| 33_1 | .....                                              |
| 34_1 | .....                                              |
| 35_1 | .....                                              |
| 36_1 | .....                                              |
| 37_1 | .....T.L..A.E.....EG.....ARR.M.....S..S.....       |
| 38_1 | .....A.K.....S.....                                |
| 39_1 | .....A.K.....S.....                                |
| 40_1 | .....                                              |
| 41_1 | .....                                              |
| 42_1 | .....                                              |

```

43_1      .....
44_1      .....K.....
45_1      .....A.K.....S.....
46_1      .....A.K.....S.....
47_1      .....
Consensus IDGGAGLDTVDYSAMIHGPRIVAPHEYGFGIEADLSREWVRKASALGVDYYDNVRNVENVIGTSMKDVLIQDAQANTLMGQGGDDTVRGGDGDLLFGGD
           1310       1320       1330       1340       1350       1360       1370       1380       1390       1400
-----:-----|-----:-----|-----:-----|-----:-----|-----:-----|-----:-----|-----:-----|-----:-----|
1_1       .....Q.....
2_1       .....P.....A.....A.....V.T.....
3_1       .....P.....A.....A.....V.T.....
4_1       .....Q.....
5_1       .....P.....A.....A.....V.T.....
6_1       .....Q.....
7_1       .....Q.....
8_1       .....Q.....
9_1       .....Q.....
10_1      .....P.....A.....A.....V.T.....
11_1      .....Q.....

```

[https://pubmlst.org/bigsdb?db=pubmlst\\_bordetella\\_seqdef&page=alleleQuery&locus=BORD005031&submit=1](https://pubmlst.org/bigsdb?db=pubmlst_bordetella_seqdef&page=alleleQuery&locus=BORD005031&submit=1) Page 9 sur 13

Locus Explorer - Bordetella MLST locus/sequence definitions 05/07/2017 12/36

```

12_1      .....Q.....T.....
13_1      .....Q.....
14_1      .....Q.....T.....
15_1      .....Q.....T.....
16_1      .....Q.....A.....
17_1      .....P.....A.....A.....V.T.....
18_1      .....P.....A.....A.....V.T.....
19_1      .....P.....A.....A.....V.T.....
20_1      .....P.....A.....A.....V.T.....
21_1      .....P.....A.....A.....V.T.....
22_1      .....Q.....

```

|           |                                                                                                     |
|-----------|-----------------------------------------------------------------------------------------------------|
| 23_1      | .....P.....A.....A.....V.T.....                                                                     |
| 24_1      | .....P.....A.....A.....V.T.....                                                                     |
| 25_1      | .....P.....A.....A.....V.T.....                                                                     |
| 26_1      | .....P.....A.....A.....V.T.....                                                                     |
| 27_1      | .....P.....A.....A.....V.T.....                                                                     |
| 28_1      | .....Q.....                                                                                         |
| 29_1      | .....P.....A.....A.....V.T.....                                                                     |
| 30_1      | .....P.....A.....A.....V.T.....                                                                     |
| 31_1      | .....Q.....Q.....T.....                                                                             |
| 32_1      | .....Q.....                                                                                         |
| 33_1      | .....Q.....A.....T.....                                                                             |
| 34_1      | .....Q.....T.....                                                                                   |
| 35_1      | .....Q.....                                                                                         |
| 36_1      | .....Q.....                                                                                         |
| 37_1      | .....P.....A.....A.....V.T.....                                                                     |
| 38_1      | .....P.....A.....A.....V.T.....                                                                     |
| 39_1      | .....P.....A.....A.....V.T.....                                                                     |
| 40_1      | .....Q.....                                                                                         |
| 41_1      | .....P.....                                                                                         |
| 42_1      | .....Q.....                                                                                         |
| 43_1      | .....Q.....                                                                                         |
| 44_1      | .....Q.....                                                                                         |
| 45_1      | .....P.....A.....A.....V.T.....                                                                     |
| 46_1      | .....P.....A.....A.....V.T.....                                                                     |
| 47_1      | .....Q.....                                                                                         |
| Consensus | GNDMLYGDAGNDTLYGGLGDDTLEGGAGNDWFGQTxAREHDVLRGGDGVDTVDYSQTGAHAGIAAGRIGLGILADLGAGRVDKLGEGSSAYDTVSGIEN |
|           | 1410 1420 1430 1440 1450 1460 1470 1480 1490 1500                                                   |
|           | ----:---- ----:---- ----:---- ----:---- ----:---- ----:---- ----:---- ----:---- ----:----           |
| 1_1       | .....                                                                                               |
| 2_1       | .....N.....                                                                                         |
| 3_1       | .....E.....N.....                                                                                   |
| 4_1       | .....                                                                                               |
| 5_1       | .....E.....N.....                                                                                   |
| 6_1       | .....                                                                                               |

|      |             |   |
|------|-------------|---|
| 7_1  | .....       |   |
| 8_1  | .....       |   |
| 9_1  | .....       |   |
| 10_1 | .....       | N |
| 11_1 | .....       |   |
| 12_1 | .....       |   |
| 13_1 | .....       |   |
| 14_1 | .....       |   |
| 15_1 | .....       |   |
| 16_1 | .....       | N |
| 17_1 | .....E..... | N |
| 18_1 | .....       | N |
| 19_1 | .....E..... | N |
| 20_1 | .....E..... | N |
| 21_1 | .....E..... | N |
| 22_1 | .....       |   |
| 23_1 | .....E..... | N |
| 24_1 | .....       | N |
| 25_1 | .....       | N |
| 26_1 | .....E..... | N |
| 27_1 | .....E..... | N |
| 28_1 | .....       |   |
| 29_1 | .....E..... | N |
| 30_1 | .....E..... | N |
| 31_1 | .....       |   |
| 32_1 | .....       |   |
| 33_1 | .....       |   |
| 34_1 | .....       |   |
| 35_1 | .....       |   |
| 36_1 | .....       |   |
| 37_1 | .....E..... | N |

[https://pubmlst.org/bigsdb?db=pubmlst\\_bordetella\\_seqdef&page=alleleQuery&locus=BORD005031&submit=1](https://pubmlst.org/bigsdb?db=pubmlst_bordetella_seqdef&page=alleleQuery&locus=BORD005031&submit=1) Page 10 sur 13

|           |                                                                                                      |
|-----------|------------------------------------------------------------------------------------------------------|
| 38_1      | .....E.....N.....                                                                                    |
| 39_1      | .....E.....N.....                                                                                    |
| 40_1      | .....G.....                                                                                          |
| 41_1      | .....                                                                                                |
| 42_1      | .....                                                                                                |
| 43_1      | .....                                                                                                |
| 44_1      | .....                                                                                                |
| 45_1      | .....E.....N.....                                                                                    |
| 46_1      | .....E.....N.....                                                                                    |
| 47_1      | .....                                                                                                |
| Consensus | VVGTELADRITGDAQANVLRGAGGADVLAGGEGDDVLLGGDGDDQLSGDAGRDRLYGEAGDDWFFQDAANAGNLLDGGDGRDTVDFSGPGRGLDAGAKGV |
|           | 1510152015301540155015601570158015901600                                                             |
|           | ----:---- ----:---- ----:---- ----:---- ----:---- ----:---- ----:---- ----:---- ----:----            |
| 1_1       | .....N.....                                                                                          |
| 2_1       | .....V.....A.....                                                                                    |
| 3_1       | .....V.....A.....                                                                                    |
| 4_1       | .....N.....                                                                                          |
| 5_1       | .....V.....A.....                                                                                    |
| 6_1       | .....                                                                                                |
| 7_1       | .....N.....                                                                                          |
| 8_1       | .....N.....                                                                                          |
| 9_1       | .....N.....                                                                                          |
| 10_1      | .....V.....A.....                                                                                    |
| 11_1      | .....                                                                                                |
| 12_1      | .....N.....                                                                                          |
| 13_1      | .....                                                                                                |
| 14_1      | .....N.....                                                                                          |
| 15_1      | .....                                                                                                |
| 16_1      | .....                                                                                                |
| 17_1      | .....V.....A.....                                                                                    |
| 18_1      | .....V.....A.....                                                                                    |
| 19_1      | .....V.....A.....                                                                                    |
| 20_1      | .....V.....A.....                                                                                    |
| 21_1      | .....V.....A.....                                                                                    |

|           |                                                                                                        |        |
|-----------|--------------------------------------------------------------------------------------------------------|--------|
| 22_1      | .....                                                                                                  |        |
| 23_1      | .....V.....                                                                                            | A..... |
| 24_1      | .....V.....                                                                                            | A..... |
| 25_1      | .....V.....                                                                                            | A..... |
| 26_1      | .....V.....T.....                                                                                      | A..... |
| 27_1      | .....V.....                                                                                            | A..... |
| 28_1      | .....                                                                                                  |        |
| 29_1      | .....V.....                                                                                            | A..... |
| 30_1      | .....V.....                                                                                            | A..... |
| 31_1      | .....                                                                                                  |        |
| 32_1      | .....                                                                                                  |        |
| 33_1      | .....N.....                                                                                            |        |
| 34_1      | .....                                                                                                  |        |
| 35_1      | .....                                                                                                  |        |
| 36_1      | .....                                                                                                  |        |
| 37_1      | .....V.....                                                                                            | A..... |
| 38_1      | .....V.....                                                                                            | A..... |
| 39_1      | .....V.....T.....                                                                                      | A..... |
| 40_1      | .....L.....                                                                                            |        |
| 41_1      | .....                                                                                                  |        |
| 42_1      | .....N.....                                                                                            |        |
| 43_1      | .....N.....                                                                                            |        |
| 44_1      | .....N.....                                                                                            |        |
| 45_1      | .....V.....                                                                                            | A..... |
| 46_1      | .....V.....                                                                                            | A..... |
| 47_1      | .....N.....                                                                                            |        |
| Consensus | FLSLGKGFASLMDEPETS NVLRHIENAVGSARDDVLIGDAGANVLNGLAGNDVLSGGAGDDVLLGDEGSDLLSGDAGNDDLFGGQGGDDTYLFGVGYGHDT |        |
|           | 1610 1620 1630 1640 1650 1660 1670 1680 1690 1700                                                      |        |
|           | ----:---- ----:---- ----:---- ----:---- ----:---- ----:---- ----:---- ----:---- ----:----              |        |
| 1_1       | .....I.....Q.....                                                                                      |        |
| 2_1       | .....I.....                                                                                            |        |
| 3_1       | .....I.....                                                                                            |        |
| 4_1       | .....I.....Q.....                                                                                      |        |
| 5_1       | .....I.....                                                                                            |        |

|      |                   |
|------|-------------------|
| 6_1  | .....I.....Q..... |
| 7_1  | .....I.....Q..... |
| 8_1  | .....I.....Q..... |
| 9_1  | .....I.....Q..... |
| 10_1 | .....T.....       |
| 11_1 | .....             |
| 12_1 | .....             |

[https://pubmlst.org/bigbdb?db=pubmlst\\_bordetella\\_seqdef&page=alleleQuery&locus=BORD005031&submit=1](https://pubmlst.org/bigbdb?db=pubmlst_bordetella_seqdef&page=alleleQuery&locus=BORD005031&submit=1) Page 11 sur 13

Locus Explorer - Bordetella MLST locus/sequence definitions 05/07/2017 12:36

|      |             |
|------|-------------|
| 13_1 | .....       |
| 14_1 | .....       |
| 15_1 | .....       |
| 16_1 | .....       |
| 17_1 | .....I..... |
| 18_1 | .....T..... |
| 19_1 | .....I..... |
| 20_1 | .....I..... |
| 21_1 | .....I..... |
| 22_1 | .....       |
| 23_1 | .....I..... |
| 24_1 | .....T..... |
| 25_1 | .....I..... |
| 26_1 | .....I..... |
| 27_1 | .....I..... |
| 28_1 | .....       |
| 29_1 | .....I..... |
| 30_1 | .....I..... |
| 31_1 | .....R..... |
| 32_1 | .....       |
| 33_1 | .....       |
| 34_1 | .....       |
| 35_1 | .....       |

|           |                                                                                                        |
|-----------|--------------------------------------------------------------------------------------------------------|
| 36_1      | .....I.....P.....                                                                                      |
| 37_1      | .....I.....P.....                                                                                      |
| 38_1      | .....I.....                                                                                            |
| 39_1      | .....I.....                                                                                            |
| 40_1      | .....                                                                                                  |
| 41_1      | .....                                                                                                  |
| 42_1      | .....I.....Q.....                                                                                      |
| 43_1      | .....I.....Q.....                                                                                      |
| 44_1      | .....I.....Q.....                                                                                      |
| 45_1      | .....I.....                                                                                            |
| 46_1      | .....I.....                                                                                            |
| 47_1      | .....I.....Q.....                                                                                      |
| Consensus | IYESGGGHD TIRINAGADQLW FARQGNDLEIRILGTDDALTVHDWYRDADHRVEAIHAANQAVDPAGIEKLVEAMAQYPDPGAAAAAPPAARVPDTLMQS |
|           | ----:-                                                                                                 |
| 1_1       | .....                                                                                                  |
| 2_1       | .....                                                                                                  |
| 3_1       | .....                                                                                                  |
| 4_1       | .....                                                                                                  |
| 5_1       | .....                                                                                                  |
| 6_1       | .....                                                                                                  |
| 7_1       | .....                                                                                                  |
| 8_1       | .....                                                                                                  |
| 9_1       | .....                                                                                                  |
| 10_1      | .....                                                                                                  |
| 11_1      | .....                                                                                                  |
| 12_1      | .....                                                                                                  |
| 13_1      | .....                                                                                                  |
| 14_1      | .....                                                                                                  |
| 15_1      | .....                                                                                                  |
| 16_1      | .....                                                                                                  |
| 17_1      | .....                                                                                                  |
| 18_1      | .....                                                                                                  |
| 19_1      | .....                                                                                                  |
| 20_1      | .....                                                                                                  |

|      |       |
|------|-------|
| 21_1 | ..... |
| 22_1 | ..... |
| 23_1 | ..... |
| 24_1 | ..... |
| 25_1 | ..... |
| 26_1 | ..... |
| 27_1 | ..... |
| 28_1 | ..... |
| 29_1 | ..... |
| 30_1 | ..... |
| 31_1 | ..... |
| 32_1 | ..... |
| 33_1 | ..... |
| 34_1 | ..... |
| 35_1 | ..... |
| 36_1 | ..... |
| 37_1 | ..... |
| 38_1 | ..... |

[https://pubmlst.org/bigsdb?db=pubmlst\\_bordetella\\_seqdef&page=alleleQuery&locus=BORD005031&submit=1](https://pubmlst.org/bigsdb?db=pubmlst_bordetella_seqdef&page=alleleQuery&locus=BORD005031&submit=1) Page 12 sur 13

Locus Explorer - Bordetella MLST locus/sequence definitions 05/07/2017 12:36

|      |       |
|------|-------|
| 39_1 | ..... |
| 40_1 | ..... |
| 41_1 | ..... |
| 42_1 | ..... |
| 43_1 | ..... |
| 44_1 | ..... |
| 45_1 | ..... |
| 46_1 | ..... |
| 47_1 | ..... |

**Consensus** LAVNWR

[https://pubmlst.org/bigsdb?db=pubmlst\\_bordetella\\_seqdef&page=alleleQuery&locus=BORD005031&submit=1](https://pubmlst.org/bigsdb?db=pubmlst_bordetella_seqdef&page=alleleQuery&locus=BORD005031&submit=1) Page 13 sur 13
