# Supplementary figures and images for: Characterization of Post-Translational Modifications and Cytotoxic Properties of the Adenylate-Cyclase Hemolysin Produced by Various Bordetella pertussis and Bordetella parapertussis Isolates
Source: MDPI journal article supplement (doi:10.3390/toxins9100304), 2017-09-26

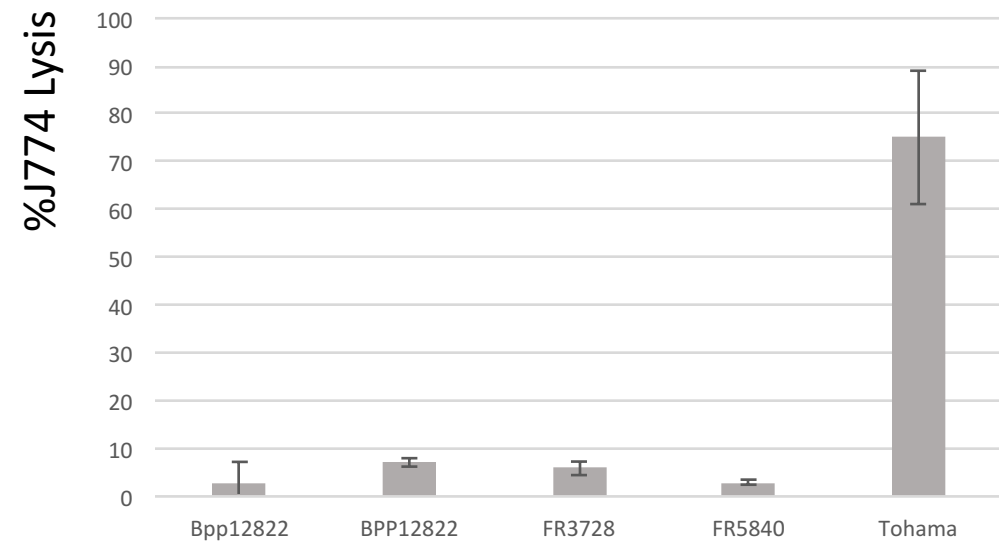

Supplement: s1 [file s1]
